1 **Defects in plant immunity modulate the rates and**  
2 **patterns of RNA virus evolution**

3

4 **Rebeca Navarro<sup>1</sup>, Silvia Ambrós<sup>1</sup>, Fernando Martínez<sup>1</sup>, Beilei Wu<sup>1,§</sup>, José L.**  
5 **Carrasco<sup>1</sup>, and Santiago F. Elena<sup>1,2,\*</sup>**

6

7 <sup>1</sup>Instituto de Biología Integrativa de Sistemas (CSIC – Universitat de València), Paterna,  
8 46182 València, Spain.

9 <sup>2</sup>The Santa Fe Institute, Santa Fe NM87501, USA.

10

11 \*Correspondence, e-mail: [santiago.elena@csic.es](mailto:santiago.elena@csic.es).

12 <sup>§</sup>Permanent address: Institute of Plant Protection, Chinese Academy of Agricultural  
13 Sciences, Haidian, 100193 Beijing, China.

14

15 *Keywords:* experimental evolution; generalism; plant immunity; plant-virus interactions;  
16 response to infection; specialization; virus evolution

17

18 **Abstract**

19 It is assumed that host genetic variability for susceptibility to infection will necessarily  
20 condition the evolution of viruses, either by driving them to diversification into strains  
21 that track the different host defense alleles (*e.g.*, antigenic diversity), or by canalization  
22 to infect only the most susceptible genotypes. Associated to these processes, virulence  
23 may or may not increase. To tackle these questions, we performed evolution experiments  
24 with turnip mosaic virus (TuMV) in *Arabidopsis thaliana* genotypes that differ in  
25 mutations in genes involved in resistance pathways and in genes whose products are  
26 essential for potyviruses infection. Plant genotypes classified into five groups according  
27 to their degree of resistance and intensity of symptoms. We found that evolution  
28 proceeded faster in the most resistant hosts than in the most permissive ones, as expected  
29 for adaptation to a harsh environment. The multifunctional viral protein VPg turned out  
30 to be the target of selection in most host genotypes. When all evolved TuMV lineages  
31 were tested for fitness in all plant genotypes used in the experiments, we found that the  
32 infection matrix was significantly nested, suggesting the evolution of generalist viruses  
33 selected by the most restrictive mutant genotypes. At the other side, a modular pattern,  
34 driven by convergent evolution of lineages evolved in the same host genotype, was also  
35 observed.

36

37 The spectrum of disease severity can be attributed to heterogeneity in virus' virulence or  
38 in host's factors; the two are not necessarily independent explanations and they must  
39 actually complement and/or interact each other. A problem faced by viruses is that host  
40 populations consist of individuals that had different degrees of susceptibility to infection  
41 (Schmid-Hempel & Koella 1994; Pfenning 2001). Therefore, adaptive changes  
42 improving viral fitness in one host genotype may be selected against, or be neutral, in an  
43 alternative one. Genetic variability in susceptibility of hosts and infectiousness of viruses  
44 have been well studied in animals and plants (*e.g.*, Schmid-Hempel & Koella 1994;  
45 Altizer 2006; Hughes & Boomsma 2006; Brown & Tellier 2011; Anttila *et al.* 2015;  
46 Parrat *et al.* 2016; González *et al.* 2019). The interaction between host and parasite  
47 genotypes has been explained in the light of two different theoretical models that  
48 represent the two extremes in a continuum of possibilities. At the one extreme, the so-  
49 called gene-for-gene (GFG) model, in which a virus genotype exists that can infect all  
50 host genotypes and a universally susceptible host genotype should also exist (Flor 1956).  
51 Resistance occurs when a host "resistance" gene is matched by at least one virus  
52 "avirulence" gene. Polymorphism in infectivity and resistance can be maintained only if  
53 virulence pays a cost. At the other extreme, the matching-alleles (MA) model is based  
54 on self- versus non-self-recognition systems in invertebrates. Infection is not possible  
55 unless the virus possesses all alleles that match those of the host (Frank 1993). In this  
56 case, polymorphism in infectivity and resistance are maintained by negative frequency-  
57 dependent selection.

58       Viral infection of plants is a complex system in which the virus parasitizes the host  
59 and utilizes all its cellular resources to replicate and systemically spread. In response,  
60 plants have evolved intricated signaling mechanisms (Zhou & Zhang 2020) that limit the  
61 spread of the virus, resulting in resistance. A variety of factors contribute to plant

62 resistance to viral infections. Broadly speaking, these factors can be classified into *basal*  
63 if they are pre-existing and limit within-cell propagation and cell-to-cell spread, and  
64 *inducible* if they are only activated upon infection and inhibit systemic virus replication  
65 and movement. Basal mechanisms include susceptibility (*S*) genes that involve alleles of  
66 cellular proteins that do not interact properly with viral factors, specially translation  
67 initiation factors, required by the virus for successful exploitation of the cell's protein  
68 synthesis machinery, heat shock proteins, that assist them in the formation of multiple  
69 multiprotein complexes, or DNA binding phosphatases (Truniger & Aranda 2009; Carr  
70 *et al.* 2010; Mäkinen 2019). In contrast, inducible mechanisms include most of resistance  
71 (*R*) genes whose expression result in a broad-scale change in plant physiology via diverse  
72 signal transduction pathways, particularly those regulated by the hormones salicylic acid  
73 (SA), jasmonic acid (JA) and ethylene (ET) (Soosaar *et al.* 2005; Carr *et al.* 2010). These  
74 changes include local cell apoptosis (*e.g.*, hypersensitive responses - HR; Loebenstein  
75 2009), the upregulation of nonspecific responses against many different types of  
76 pathogens throughout the entire plant (systemic acquired resistance – SAR- and induced  
77 systemic resistance – ISR) (Kachroo *et al.* 2006; Carr *et al.* 2010), and the activation of  
78 the RNA-silencing-based resistance, which seems to play a role both in basal and  
79 inducible mechanisms (Voinnet 2001; Carr *et al.* 2010). Early host responses following  
80 virus detection include changes in ion fluxes (mainly Ca<sup>++</sup>), activation of signaling  
81 pathways, major alterations of transcriptomic profiles, generation of reactive oxygen  
82 species (ROS) and production of nitric oxide (NO) (Soosaar *et al.* 2005). These  
83 immediate changes are followed by HR and the recruitment of SA and JA/ET signaling  
84 pathways. The SA-mediated defense signaling pathway results in SAR, while the JA/ET-  
85 mediated defense signaling pathway results in ISR, the latter being specifically involved  
86 in symbiotic interactions between plants and beneficial microbes. Indeed, it appears that

87 ISR is not effective against infection by most viruses (Ton *et al.* 2002; Loebenstein 2009;  
88 Pieterse *et al.* 2009). Interestingly, both SAR and ISR pathways converge into two master  
89 regulators, the *ENHANCED DISEASE SUSCEPTIBILITY 1 (EDS1)* and the  
90 *PHYTOALEXIN DEFICIENT 4 (PAD4)* genes; *EDS1* and *PAD4* repress ISR and promote  
91 SAR. Although the SA and JA/ET pathways have been classically viewed as mutually  
92 antagonistic, several studies have revealed positive and negative crosstalk between them  
93 (van Wees *et al.* 2000; Pieterse *et al.* 2012) as well as between them and the RNA-  
94 silencing pathway (Soosaar *et al.* 2005; Carr *et al.* 2010; Yang *et al.* 2020). This  
95 crosstalk, which has the network topological structure of an incoherent feed-forward loop,  
96 creates robustness and tunability in the plant immune network (Mine *et al.* 2017).

97 A particularly well study example of *S* genes in the context of genetic variability  
98 for resistance and virus adaptation in *Arabidopsis thaliana* (L.) Heynh are the  
99 *RESTRICTION TO TEV MOVEMENT (RTM)* genes, composed by at least five different  
100 loci (Sofer *et al.* 2017) that encode for a variety of functions needed by tobacco etch virus  
101 (TEV; genus *Potyvirus*, family *Potyviridae*), and other potyviruses, to induce a systemic  
102 infection of the plant. The mechanism of resistance in this case is well understood:  
103 dominant alleles in all five loci result in resistance, whereas homozygous deletions in at  
104 least one of the loci result in increased susceptibility to infection and different degrees of  
105 systemic infection. By means of experimental evolution, it has been shown that TEV can  
106 readily adapt to different plant ecotypes. In particular, serial passages in susceptible plant  
107 genotypes *rtm1/rtm1* result in a viral isolate (TEV-*At17*) capable of infecting otherwise  
108 fully resistant genotypes (Agudelo-Romero *et al.* 2008; Lalić *et al.* 2010). Additional  
109 passages of TEV-*At17* in plants with different *RTM* configurations resulted in increased  
110 local adaptation and, more interestingly, in the evolution of a GFG-like interaction  
111 mechanism: the most susceptible plant genotype selected for less pathogenic and highly

112 specialized viruses while the most resistant plant genotype selected for more virulent and  
113 generalist TEV isolates (Hillung *et al.* 2015). Later on, these results were confirmed with  
114 turnip mosaic virus (TuMV; genus *Potyvirus*, family *Potyviridae*) in the context of fully  
115 monomorphic or maximally polymorphic experimental *A. thaliana* populations  
116 (González *et al.* 2019).

117         However, these previous studies have barely paid any attention to the intricacies of  
118 the underlying defense regulatory pathways of *A. thaliana*, the existence of multiple  
119 defense responses (*e.g.*, SAR, ISR, RNA-silencing, and the diversity of *S* genes) and the  
120 potential crosstalk among them. Therefore, an open question is how this intricacy  
121 determines the evolutionary fate of viruses. For instance, would two independent defense  
122 pathways select for specialist viruses adapted to counteract each one thus conforming a  
123 fitness tradeoff? Would a tradeoff in the investment of plant resources between pathways  
124 (*e.g.*, SAR vs ISR) result in a diversification of virus adaptive strategies? Would viruses  
125 target crosstalk points across pathways thus evolving as generalists? Here we will use  
126 the TuMV-*A. thaliana* experimental pathosystem to explore this sort of questions. After  
127 exploring the variability in phenotypic responses to TuMV infection of a collection of *A.*  
128 *thaliana* mutants in different *S* and *R* genes, we choose nine mutants which represent the  
129 entire diversity in phenotypic responses, including both basal and inducible resistance  
130 mechanisms. Then, we performed evolution experiments on each plant mutant genotype  
131 and track the evolution of several disease-related traits. At the end of the evolution  
132 experiment, we evaluated the effect of host genotypes in the rates of virus evolution and  
133 the contribution of contingency, selection and stochasticity into the outcome of evolution.  
134 Next, we explored whether the different TuMV lineages evolved as specialist or  
135 generalists depending on the mutated defense mechanism of their local hosts. Finally,

136 we sought to identify the molecular changes experienced in the genome of the different  
137 viral lineages and explored the possible adaptive value of a few convergent mutations.

138

139

## 140 **Results**

### 141 **Classification of *A. thaliana* genotypes according to their phenotypic response to**

### 142 **TuMV infection**

143 The 21 *A. thaliana* mutant genotypes used in the study are shown in Table 1, including

144 information about the affected signaling pathways or cellular processes as well as the

145 expected phenotype of infection relative to wild-type (WT) plants based on the

146 description of these mutants. Genotypes were classified according to their phenotypic

147 response to TuMV infection based in five different disease-related traits measured 18

148 days post-inoculation (dpi). Fig. 1 shows the neighbor-joining clustering of genotypes

149 according to their multi-trait phenotypic response to TuMV infection (data in Fig. S1);

150 we found five significant groups (hereafter named as G1 to G5). For all four members of

151 G1 the response was highly homogenous and consistent with an enhanced resistance

152 response to TuMV infection: no significant change in  $\Delta DW$  whilst a significant and

153 consistent reduction in *SS*, *AUDPS*, *I*, and *VL* relative to infected WT plants. Three

154 members of G1 had enhanced SAR response (Table 1) and the fourth one (*i4g2*) is a well-

155 known *S* gene involved in plant resistance to potyvirus (Nicaise *et al.* 2007; Gallois *et al.*

156 2010). The only member of G2 was the strong apoptosis-inducer mutant *p58<sup>IPK</sup>*, which

157 shows no significant changes in *SS*, *AUDPS*, *I*, and *VL* relative to infected WT plants but

158 a significant reduction in  $\Delta DW$ , indeed, infected plants were heavier than the noninfected

159 controls, thus being this a case of increased tolerance to infection. The only member of

160 G3 was mutant *dbp2*, also described as specifically increasing resistance against another

161 potyvirus (Castelló *et al.* 2011), which shows a very interesting response to TuMV  
162 infection:  $\Delta DW$  was significantly increased while *SS*, *AUDPS* and *I* were significantly  
163 reduced; no effect in *VL* was observed. Thus, *dbp2* represents an intermediate response  
164 to TuMV infection between the highly resistant G1 and those genotypes in G4. G4  
165 represents a sort of hotchpotch formed by genotypes that at most differ from WT plants  
166 in two traits, but without a clear pattern. Remarkably, though, with the exception of *cpr5-*  
167 *2*, *dcl2 dcl4*, and *dip2*, all show significant reductions in *VL*. Therefore, members from  
168 G4 would be considered similar to WT in their phenotypic response to TuMV infection.  
169 Finally, *jin1* was the only member of G5, which shows a significant increase in all  
170 measured traits except *VL*, consistent with and enhanced susceptibility to TuMV  
171 infection. This is a surprising finding since *jin1* has been described as inducing a  
172 constitutive expression of the SA-dependent defenses that made plants extremely  
173 resistant to the infection of biotrophic bacterial pathogens (Laurie-Berry *et al.* 2006). To  
174 further characterize the progression of infection, we selected a subset of representatives  
175 from groups G1 (*eds8-1*) and G4 (*cpr5-2*, *dcl2 dcl4* and *hsp90-1*) and evaluated daily *I*,  
176 *SS* and *VL* (Fig. S2). The *cpr5-2* plants started showing symptoms faster, though only  
177 80% of plants showed symptoms after 15 dpi. Only 20% of plants of genotype *eds8-1*  
178 showed symptoms of infection, which were delayed on time. Infected *hsp90-1* and *dcl2*  
179 *dcl4* plants were undistinguishable from the WT infected ones. Regarding *VL*, all  
180 genotypes accumulated less virus than WT plants, with *cpr5-2* being the one that did so  
181 the less (Fig. S2)

182       Representatives from the five groups were selected for the subsequent evolution  
183 experiment, covering the entire spectrum of responses to TuMV infection and  
184 mechanisms of resistance/susceptibility (shadowed rows in Table 1): *eds8-1* and *i4g2*  
185 from G1 representing the hardest selection regimes (more resistant genotypes); *p58<sup>IPK</sup>*



186 from G2; *dbp2* from G3; *cpr5-2*, *dcl2 dcl4*, *hsp90-1*, and *npr1-1* from G4; and *jin1* from  
187 G5 representing the softest selective regime (less resistant genotype).

188

### 189 **Experimental evolution in the representative *A. thaliana* genotypes**

190 First, we sought to evaluate the dynamics of evolution for *AUDPS* (Fig. 2), *I* (Fig. 3) and  
191 *VL* (Fig. 4). Data in these figures were fitted all together to the multivariate analysis of  
192 covariance (MANCOVA) model described in Eq. 1 of the Methods section. Notice that  
193 lineage *cpr5-2/L2* showed a quite different evolution pattern from the other four lineages  
194 evolved in *cpr5-2*. It never increased in either of the three traits and was lost after passage  
195 five (Fig. 2, Fig. 3). Therefore, we ended up with 44 evolved lineages.

196 Table 2 shows the results of this MANCOVA. Despite a considerable amount of  
197 noise in the time series, we found some significant results that can be summarized as  
198 follows. First, a net significant and large ( $\eta_p^2 = 0.735$ ) effect associated to the  
199 evolutionary passages has been observed, indicating that the three phenotypic traits  
200 related to TuMV infection evolved during the experiment. Second, plant genotypes had  
201 a highly significant and large ( $\eta_p^2 = 0.547$ ) effect on the phenotypic traits, suggesting that  
202 TuMV evolutionary dynamics were strongly influenced by the local host genotype in  
203 which it was being passaged. More interestingly, this effect associated to host plant  
204 genotypes was strongly dependent on the passage number ( $\eta_p^2 = 0.463$ ), thus suggesting  
205 that the slope of the relationship between phenotypic traits and time was influenced by  
206 the local host genotype. This effect will be further evaluated in the next section. Third,  
207 independent lineages show a strong degree of evolutionary parallelism, as indicated by  
208 nonsignificant differences among viral lineages evolved in the same local host genotype  
209 (factors  $L(G)$  and  $t \times L(G)$ ). However, this last conclusion should be taken with certain

210 level of caution since the power of the two tests is relatively low ( $1 - \beta < 0.800$ ) and  
211 hence we might be wrongly failing to reject the null hypothesis (type II error).

212 A relevant question in evolutionary biology is the extent in which ancestral  
213 differences determine the fate of evolution. In other words, the relative contribution of  
214 adaptation, chance and historical contingency to the evolution or organismal fitness.  
215 Following the logic exposed by Travisano *et al.* (1995), we can imagine two situations.  
216 First, ancestral statistical differences among phenotypes could be preserved along  
217 evolution despite a net increase in the mean trait values (due to selection) and differences  
218 among replicated lineages (due to chance; *i.e.*, mutation and drift). In this situation, we  
219 should expect a nonzero slope in a regression of the evolved phenotypic values against  
220 the ancestral ones. The closer the slope to a value of one, the more importance of ancestral  
221 differences. Second, if initial trait variation among ancestral genotypes was eliminated  
222 from the evolved populations because the combined effect of adaptation and chance, we  
223 should expect a regression slope smaller than one. The less effect of ancestral differences,  
224 the flatter the slope, being zero in the extreme case of ancestral differences being  
225 completely erased. To evaluate the role of the ancestral differences in *AUDPS*, *I* and *VL*  
226 of TuMV across the nine different plant genotypes, we evaluated the magnitude of their  
227 change at the end of the evolution experiment. Fig. 5 shows the plots of evolved *vs*  
228 ancestral values. For illustrative purposes, the diagonals represent the null hypothesis of  
229 absolute preservation of ancestral differences. In the case of *AUDPS* (Fig. 5A), a  
230 significant regression exists between evolved and ancestral values ( $R = 0.510$ ,  $F_{1,42} =$   
231  $14.732$ ,  $P < 0.001$ ), with a slope of  $0.296 \pm 0.077$  ( $\pm 1$  SD). Since the slope is still  
232 significantly different from zero, yet clearly flatter than the diagonal ( $t_{42} = 9.112$ ,  $P <$   
233  $0.001$ ), we conclude that ancestral differences have been mostly removed by the  
234 combined action of selection and chance yet not completely erased. In the case of *I* (Fig.

235 5B) the regression was not significant ( $R = 0.087$ ,  $F_{1,43} = 0.031$ ,  $P = 0.568$ ), thus  
236 suggesting that for this trait ancestral differences among *A. thaliana* genotypes have been  
237 fully erased by adaptation and chance. Finally, in the case of *VL* (Fig. 5C), the regression  
238 of evolved values on ancestral ones was significant ( $R = 0.417$ ,  $F_{1,43} = 8.822$ ,  $P = 0.005$ ),  
239 suggesting again that ancestral phenotypic differences have been largely removed by  
240 selection and chance yet some still persist (regression slope  $-0.142 \pm 0.048$  significantly  
241 different from one:  $t_{42} = 23.903$ ,  $P < 0.001$ ).

242

### 243 **Rates of phenotypic evolution for disease-related traits**

244 As mentioned in the previous section, we have observed a significant effect of *A. thaliana*  
245 genotypes in the temporal evolution of the three phenotypic traits. To further explore this  
246 effect, we estimated the rates of phenotypic evolution of *AUDPS* and *I* using the  
247 ARIMA(1,0,0) model described in the Methods section (Eq. 2). *VL* was not included in  
248 this analysis since the number of data points (three) in the time series was the same than  
249 the number of parameters to be estimated, thus likely incurring in overfitting problems.

250 Fig. 6 shows the estimated rates of evolution,  $\beta$ , for host genotypes ordered from  
251 the most resistant (G1) to the most permissive (G5) ones. Very interestingly, a significant  
252 negative regression coefficient exists for both traits [*AUDPS*:  $-1.460 \cdot 10^{-2} \pm 0.412 \cdot 10^{-2}$   
253 ( $R = 0.480$ ,  $F_{1,42} = 12.561$ ,  $P = 0.001$ ) and *I*:  $-3.161 \cdot 10^{-3} \pm 0.909 \cdot 10^{-3}$  ( $R = 0.473$ ,  $F_{1,42} =$   
254  $12.105$ ,  $P = 0.001$ )], suggesting that evolution always proceeded faster in the most  
255 restrictive hosts and slower in the most permissive ones.

256

### 257 **Dissecting the role of specific defense mechanisms in TuMV evolution**

258 The rates of TuMV phenotypic evolution estimated in the previous section were further  
259 analyzed in the context of the mutated defense signaling pathway encoded by *R* genes or

260 recessive resistances encoded by *S* genes. Rates of evolution  $\beta_{AUDPS}$  and  $\beta_I$  were fitted to  
261 the MANOVA model shown in Eq. 3 of the Methods section. Fig. 7 graphically  
262 summarizes the results of these analyses. First, we sought for differences in rates of  
263 evolution between permissive (soft selection) and restrictive (hard selection) hosts (Fig.  
264 7A). The multivariate analysis shows that lineages evolved in the more restrictive hosts  
265 evolved significantly faster than those evolved in the more permissive hosts ( $\Lambda = 0.327$ ,  
266  $F_{2,34} = 34.923$ ,  $P < 0.001$ ), with the effect being mostly driven by differences in the rate  
267 of infectivity evolution  $\beta_I$ , as shown by the corresponding univariate analyses, being on  
268 average 3.14 times faster in the most restrictive hosts. This observation confirms the  
269 results shown in the previous section.

270 Next, we evaluated whether differences exist between the rates of phenotypic  
271 evolution for viruses evolving in host genotypes carrying mutations affecting resistance  
272 (*R*; *i.e.*, the SAR, ISR and RNA-silencing pathways) or susceptibility (*S*; *dbp2*, *dip2*,  
273 *hsp90-1*, *i4g2*, and *p58<sup>IPK</sup>*) genes (Fig. 7B). In this case, the multivariate analysis found  
274 a small yet significant effect ( $\Lambda = 0.790$ ,  $F_{2,34} = 4.507$ ,  $P = 0.018$ ), though none of the  
275 two univariate analyses had enough power to detect it (indeed, changes went in opposite  
276 directions: 1.02-fold larger for  $\beta_{AUDPS}$  in the *S* plants but 1.31 times larger for  $\beta_I$  in the *R*  
277 plants).

278 Fig. 7C shows the comparison of rates of TuMV phenotypic evolution for lineages  
279 evolving in plant genotypes mutant for the SA-dependent signaling defense pathways. In  
280 this case we have three categories: mutations inducing a down-expression of the pathway,  
281 mutations with no effect on this pathway and mutations resulting in overexpression.  
282 Again, the MANOVA found highly significant differences among the three categories ( $\Lambda$   
283  $= 0.213$ ,  $F_{4,68} = 19.861$ ,  $P < 0.001$ ). The univariate analyses show that most of the  
284 differences were due to a faster evolution of *I*, being 2.38 times faster in the host

285 genotypes over-expressing the SAR defenses than in those with a WT or even down-  
286 expression of the SA signaling.

287 SA- and JA/ET-dependent pathways are considered as antagonistic defenses,  
288 although more recent evidences point towards an active crosstalk between both (van Wees  
289 *et al.* 2000; Pieterse *et al.* 2012; Mine *et al.* 2017). Under the antagonistic hypothesis,  
290 we should expect the opposite trend than observed for the lineages evolved in plants over-  
291 expressing SAR defenses (Fig. 7C). Fig. 7D shows the evolution rates data classified  
292 according to whether host genotypes had mutations affecting the JA/ET defense (ISR)  
293 signaling pathway. The MANOVA found a significant difference between the two  
294 categories ( $\lambda = 0.433$ ,  $F_{2,34} = 22.258$ ,  $P < 0.001$ ), entirely driven by differences in  $\beta_i$ , as  
295 confirmed by the univariate analyses. Indeed, as expected, the rates of evolution for  
296 infectivity were 2-fold faster for TuMV lineages evolved in the ISR deficient hosts, in  
297 agreement with the SAR/ISR antagonistic hypothesis.

298 Finally, we tested the effect of knocking down the host's RNA-silencing pathway  
299 in the rates of TuMV evolution (Fig. 7E). In this case, the multivariate analysis also found  
300 highly significant differences between rates of viral evolution in plants with a fully  
301 functional RNA-silencing pathway and *dcl2 dcl4* plants ( $\lambda = 0.490$ ,  $F_{2,34} = 17.729$ ,  $P <$   
302  $0.001$ ), with average  $\beta_i$  values being 21-fold larger in plants expressing a fully functional  
303 RNA-silencing pathway than in *dcl2 dcl4* plants unable of producing siRNAs.

304 In conclusion from this section, we found that regardless the defense signaling  
305 pathway, viruses evolving in permissive plants always evolve slower than their  
306 counterparts evolving in more restrictive plant genotypes.

307

308 **Permissiveness of *A. thaliana* genotypes to infection drive the evolution of specialist**  
309 **or generalist TuMV lineages**

310 To analyze the specificity of adaptation of each evolved TuMV lineage, we performed a  
311 full cross-infection experiment in which all the 44 evolved lineages were inoculated into  
312 ten plants of the nine *A. thaliana* genotypes used in the evolution experiments. The  
313 presence of symptoms on each plant was evaluated daily for up to 12 dpi. These data  
314 were analyzed using two different approaches, first an ANOVA-like that evaluates the  
315 effect of host genotypes, viral lineages and their interactions (Schmid-Hempel, 2011);  
316 and second, the inference and characterization of nestedness, modularity and  
317 specialization of an infection network (Weitz *et al.* 2013). For the first approach we fitted  
318 the presence/absence of symptoms data to the logistic regression model shown in Eq. 4  
319 of the Methods section. The results are shown in Table 3. Despite its apparent  
320 complexity, interpretation is straightforward. A *TG* factor describes the effect of  
321 differences among host genotypes, irrespective of the infecting viral lineage; it thus  
322 characterizes whether some host genotypes are more susceptible than other to infection.  
323 As shown in Table 3, a *TG* has a highly significant effect, both by itself and in the  
324 interaction with *t*. The magnitude of the net effect was very large ( $\eta_P^2 = 0.569$ ), while its  
325 interaction with *t* was rather small in magnitude ( $\eta_P^2 = 0.010$ ). On average, the most  
326 susceptible host genotypes were *jin1*, *dcl2 dcl4* and *cpr5-2* ( $\bar{f} = 1.000$ ), whereas the most  
327 resistant host genotypes were *p58<sup>IPK</sup>* ( $\bar{f} = 0.459 \pm 0.013$ ) and *eds8-1* ( $\bar{f} = 0.233 \pm 0.013$ ).  
328 Similarly, a highly significant *LG* effect exists by itself (of large magnitude  $\eta_P^2 = 0.288$ )  
329 as well as in combination with *t* (though the magnitude of the interaction was rather small  
330 in magnitude  $\eta_P^2 = 0.005$ ), which means that the observation depends on the viral lineage  
331 independently of the host genotype. On average, the lineages evolved in *eds8-1* ( $\bar{f} =$   
332  $0.997 \pm 23.710$ ) and *dbp2* ( $\bar{f} = 0.994 \pm 26.108$ ) were those inducing symptoms faster; by  
333 contrast, lineages evolved in *i4g2* ( $\bar{f} = 0.788 \pm 279.090$ ) showed symptoms much slower.  
334 Finally, and most interesting, a highly significant interaction term *TG*×*LG* (as well as in

335 combination with  $t$ ) indicates that the outcome depends on the particular combinations of  
336 host genotypes and TuMV lineages. Indeed, the magnitude of the interaction effect was  
337 large ( $\eta_p^2 = 0.314$ ), though its dependence with dpi was not so relevant ( $\eta_p^2 = 0.048$ ). For  
338 example, in the extreme of the most susceptible genotypes, the case of *cpr5-2* perfectly  
339 illustrates this case: lineages evolved in *cpr5-2*, *dbp2*, *dcl2 dcl4*, *eds8-1*, and *p58<sup>IPK</sup>* all  
340 show  $\bar{f} = 1.000$ , whereas lineages evolved in *i4g2* and *jin1* show much lower  $\bar{f}$  values  
341 ( $0.674 \pm 0.028$  and  $0.849 \pm 0.032$ , respectively). In the opposite extreme, e.g. in *eds8-1*  
342 lineages evolved in *eds8-1* show  $\bar{f} = 0.575 \pm 0.050$  while lineages evolved in *jin1* show  $\bar{f}$   
343  $= 0.124 \pm 0.030$ ; all other lineages showing intermediate values.

344 For the second analytical approach, we used the above infection dataset to estimate  
345 the corresponding *AUDPS* values, thus creating an infection matrix of 44 rows [ $L(LG)$ ]  
346 by nine columns ( $TG$ ). This matrix was transformed into a new binary matrix in which a  
347 value of one meant that the *AUDPS* for a given TuMV lineage in a particular  $TG$  was  
348 greater or equal than observed for its  $LG$  and zero otherwise. Fig. 8A shows the packed  
349 infection matrix with rows and columns organized to better highlight its nestedness and  
350 modularity (Weitz *et al.* 2013). The matrix could be used to build a binary infection  
351 network (Fig. 8B) that provides the same information in a more graphical way. The  
352 infection network was significantly nested ( $T = 14.706$ ,  $P < 0.001$ ), with the most  
353 permissive genotypes *jin1* and *dcl2 dcl4* being susceptible to most viral lineages  
354 (universally susceptible hosts), while the most resistant genotype *eds8-1* and *p58<sup>IPK</sup>* were  
355 only successfully infected by some lineages that were precisely evolved in these two  
356 genotypes. Likewise, the most generalist viral lineages were *eds8-1/L4*, *p58<sup>IPK</sup>/L3* and  
357 *p58<sup>IPK</sup>/L4* that infected with equal efficiency all nine host genotypes (universally virulent  
358 viruses), while the most specialized viral lineages, able only to successfully infect their  
359 local hosts, were all surviving lineages evolved in *cpr5-2*, four lineages evolved in *dcl2*

360 *dcl4* and four lineages evolved in *jin1* (Fig. 8). Therefore, we conclude that local host's  
361 resistance to infection positively correlates with the host range of the evolved lineages:  
362 more resistant host genotypes selected for very generalist viruses while less resistant host  
363 genotypes selected for very specialized viruses, in agreement with a gene-for-gene  
364 infection model (Weitz *et al.* 2013).

365 Finally, we computed Blüthgen *et al.* (2006) specialization indexes for the packed  
366 matrix shown in Fig. 8. Firstly, we evaluated the standardized species-level measure of  
367 partner diversity  $d'$ .  $d'$  ranged from zero for the most generalist TuMV lineages (*eds8-*  
368 *1/L4*, *p58<sup>IPK</sup>/L3* and *p58<sup>IPK</sup>/L4*) to one for the most specialist ones (the four surviving  
369 *cpr5-2*-evolved lineages, *dbp2/L2*, *dcl2 dcl4/L2 - L5* and *jin1/L1 - L4*) (last column in  
370 Fig. 8A). Secondly, we computed the network-level specialization index  $H'_2$ , obtaining a  
371 value of  $H'_2 = 0$  (uncorrected  $H_2 = 5.024$ ,  $H'_{min} = 3.534$ ,  $H'_{max} = 5.024$ ;  $P < 0.001$ ), which  
372 means that, overall, the binary infection network shows a degree of specialization, with  
373 most lineages being able of infecting one or few host genotype, a result mainly driven by  
374 those TuMV lineages evolved in the less resistant host genotypes.

375 Finally, we sought to explore if the infection network in Fig. 8B also shows  
376 evidences of modularity. Indeed, from an ecological standpoint, a significant network-  
377 level degree of specialization means that some TuMV lineages do not interact well with  
378 some of the *A. thaliana* genotypes, thus creating the possibility of modularity. In this  
379 context, a module will refer to an aggregated set of viral lineages characterized by more  
380 interactions within the module than between modules (Newman 2006; Dormann &  
381 Strauss 2014). To this end, we computed the  $Q$  modularity index, which ranges from  
382 zero, when the community has no more links within modules than expected by chance,  
383 to a maximum value of one. We found a small yet significant modularity ( $Q = 0.234$ ,  $P$   
384  $= 0.047$ ) in the infection matrix (Fig. 8A). What are the implications of modularity in



385 TuMV pathogenesis? Modularity is expected for a MA infection model (Weitz *et al.*  
386 2013). More similar host genotypes, *e.g.*, those with mutations affecting the same  
387 signaling pathway, may be selecting for viral lineages with similar properties, thus being  
388 able of infecting with equal efficiency the subset of plant genotypes. A less appealing  
389 alternative hypothesis to explain the observed modularity may be parallel evolution of  
390 lineages evolved into the same host genotype; the most representative cases of this  
391 possibility being the lineages evolved in *cpr5-2*, *dcl2 dcl4* and *jin1*. To distinguish  
392 between these two hypotheses, we computed a reduced matrix averaging the observed  
393 *AUDPS* among TuMV lineages evolved in the same host genotype and transforming this  
394 nine by nine infection matrix into a packed binary matrix as described above. If the  
395 reduced matrix still shows significant modularity, the first hypothesis will hold, while if  
396 modularity disappears by averaging lineages evolved in the same host genotype, then the  
397 alternative hypothesis will be more parsimonious. The reduced matrix is still  
398 significantly nested ( $T = 13.064$ ,  $P < 0.001$ ), but modularity was not significant anymore  
399 ( $Q = 0.286$ ,  $P = 0.137$ ), thus supporting the alternative hypothesis that the observed  
400 modularity was driven by convergent evolution of lineages evolved into the same host  
401 genotype rather than by the overlap of selective pressures by genotypes carrying  
402 mutations in the same defense mechanism.

403

#### 404 **Genomic differences/similarities among TuMV lineages and VPg as a potential** 405 **target of selection**

406 Finally, we have explored the molecular changes experienced by the TuMV evolved  
407 lineages. Full genomic consensus sequences were determined for all 44 evolved lineages.  
408 A total of 114 mutational events have been observed, affecting 71 nucleotide position  
409 (Supplementary Fig. S3A and Table S1). According to the type of nucleotide substitution

410 involved, 93 were transitions and 21 transversions; regarding their effect on the protein  
411 sequence, 30 were synonymous and 84 nonsynonymous. Interestingly, some mutations,  
412 including 13 nonsynonymous and four synonymous, have been observed multiple times  
413 in independent lineages. As discussed in the Methods section, treating each lineage as an  
414 observation and each host genotype as a subpopulation, the average nucleotide diversity  
415 within host genotypes, referred only to the 71 polymorphic sites, is  $\pi_S = 0.067 \pm 0.007$ .  
416 On the other hand, the nucleotide diversity for the entire sample is  $\pi_T = 0.074 \pm 0.007$ .  
417 Consequently, the estimate of interhost genotypes nucleotide diversity is  $\delta_{ST} = 0.007$   
418  $\pm 0.003$ , and the estimated coefficient of nucleotide differentiation (Nei 1982),  $N_{ST} = 0.090$   
419  $\pm 0.033$ , a value significantly greater than zero ( $z = 2.727$ ,  $P = 0.003$ ). Thus, we conclude  
420 that minor yet significant genetic differentiation has been generated among viral lineages  
421 replicating in different host genotypes. To assess whether selection played a role in  
422 genetic differentiation among *A. thaliana* genotypes, we performed a Tajima's *D* test  
423 (Tajima 1989) and found that it was significantly negative ( $D = -2.487$ ,  $P = 0.006$ ).

424 Next, we sought to characterize the distribution of mutational events along the nine  
425 non-overlapping cistrons (Fig. S3B). The frequency of mutations per cistron, relative to  
426 the length of the corresponding cistron, was fitted to the logistic regression model shown  
427 in Eq. 5 of the Methods. Highly significant differences exist ( $\chi^2 = 127.545$ , 9 d.f.,  $P <$   
428  $0.001$ ), yet entirely due to the  $\sim 16$ -fold larger mutation frequency observed in the *VPg*  
429 cistron relative to the rest of the genome (Fig. S3B). Notice that all mutations observed  
430 in *VPg* are nonsynonymous and that all lineages except *eds8-1/L3* carry at least one  
431 mutation in this cistron (Fig. S3A and Table S1).

432 Convergent nonsynonymous mutations are, *a priori*, good candidates for adaptive  
433 mutations. Mutation CP/V148I appears in two lineages evolved in *cpr5-2* (Fig. S3A and  
434 Table S1), mutation CP/S70N appear in lineage *dcl2 dcl4/L1* and three lineages evolved

435 in *jin1* (Fig. S3A and Table S1), and two different mutations affecting CP amino acid  
436 112, CP/D112G (lineage *npr1-1/L4*) and CP/112A (lineage *i4g2/L5*), that result in a  
437 similar replacement of side chains. In addition, seven nonsynonymous mutations in VPg  
438 are shared by several lineages (Fig. S3A and Table S1). Out of these seven cases, three  
439 seem particularly promising candidates. They all are located in a narrow region of VPg  
440 (residues 113, 115 and 118) (Fig. S3A and Table S1). Firstly, mutations G6237A,  
441 G6237C, A6238G, and U6239A all affect the same codon, resulting in amino acid  
442 replacements D113N, D113H, D113G, and D113E, respectively. The expected  
443 functional effect of these mutations was evaluated using the algorithms implemented in  
444 SNAP2 (Hecht *et al.* 2015). D113E is predicted to be functionally neutral (score = -76,  
445 accuracy = 87%), while D113G (32, 66%), D113H (43, 71%) and D113N (30, 66%) are  
446 predicted to have a functional effect. Among these three amino acid replacements,  
447 D113G, which shows an intermediate value of the functional effect score, is particularly  
448 interesting, involving a very strong change in the side radical from a long negatively  
449 charged one to a small nonpolar one. This replacement has been observed in lineages  
450 *cpr5-2/L3*, *cpr5-2/L4*, *cpr5-2/L5*, *npr1-1/L1*, *npr1-1/L5*, and *hsp90-1/L2*. All three hosts  
451 for these lineages belong to the phenotypic group G4 in Fig. 1. Secondly, mutations  
452 A6243C, A6243G and A6244G also affect the same codon, resulting in amino acid  
453 replacements N115H (-42, 72%), N115E (-66, 82%) and N115S (-30, 61%). All three  
454 are predicted to be functionally neutral. Thirdly, mutations U6252 and G6253A affect  
455 the same codon and result in amino acid replacements R118C (-10, 53%) and R118H  
456 (56, 78%), respectively. The most frequent among these two replacements is R118H,  
457 which represents a conservative change among large positively charged side radicals, yet  
458 has a strong expected functional effect. R118H has been observed in four out of five  
459 TuMV lineages evolved in the *A. thaliana* mutant *jin1* (phenotypic group G5 in Fig. 1).

460 D113G thus represents a case of convergent evolution non-specific of the local host  
461 genotype (*i.e.*, a candidate for a generalist mutation) while R118H represents a mutation  
462 highly specific of the local host genotype (*i.e.*, a specialist mutation).

463 To further characterize the possible adaptive value of mutations VPg/D113G and  
464 VPg/R118H, we created by site-directed mutagenesis the two mutated versions of VPg  
465 and cloned them into the ancestral p35STunos infectious clone (Chen *et al.* 2003).  
466 Viruses were recovered from these clones and three disease-related phenotypic traits (*e.g.*,  
467 AUDPS, *I* and *SS*) evaluated both in the WT plants as well as in their corresponding local  
468 hosts (*i.e.*, *cpr5-2* for mutant VPg/D113G and *jin1* for mutant VPg/R118H). Fig. 9  
469 summarizes the results of these experiments. Regarding VPg/D113G (Fig. 9A - C), the  
470 results strongly depend on the combination of phenotypic trait and plant genotype: it  
471 shows a significant negative effect in both AUDPS ( $-14.2\%$ ;  $z = 1.687$ ,  $P = 0.046$ ) and *I*  
472 ( $-23.9\%$ ;  $z = 6.344$ ,  $P < 0.001$ ) but a positive one in *SS* ( $16.7\%$ ;  $z = 2.597$ ,  $P = 0.005$ )  
473 when evaluated in WT plants. However, it shows a largely negative yet not significant  
474 effect in *cpr5-2* plants for AUDPS ( $-60.8\%$ ;  $z = 1.055$ ,  $P = 0.146$ ) and significant negative  
475 effects both for *I* ( $-60.1\%$ ;  $z = 10.614$ ,  $P < 0.001$ ) and *SS* ( $-46.7\%$ ;  $z = 3.228$ ,  $P = 0.001$ ).  
476 These negative effects on the local host genotype *cpr5-2* do not support a possible  
477 beneficial effect of this mutation by itself. Regarding the possible adaptive effect of the  
478 amino acid replacement VPg/R118H (Fig. 9D - F), the results are also dependent on the  
479 combination of phenotypic trait and host plant genotype. When tested in WT plants, the  
480 mutation has significant negative effects both for AUDPS ( $-11.4\%$ ;  $z = 2.29$ ,  $P = 0.013$ )  
481 and *I* ( $-9.0\%$ ;  $z = 2.749$ ,  $P = 0.003$ ) but a significantly positive effect for *SS* ( $43.6\%$ ;  $z =$   
482  $7.881$ ,  $P < 0.001$ ). By contrast, in the local host *jin1* the effect was positive in all three  
483 traits; significant for AUDPS ( $9.2\%$ ;  $z = 1.683$ ,  $P = 0.046$ ) and *SS* ( $68.2\%$ ;  $z = 12.447$ ,  $P$   
484  $< 0.001$ ) but not for *I* ( $0.3\%$ ;  $z = 1.342$ ,  $P = 0.090$ ). These results support the conclusion

485 that the amino acid replacement VPg/R118H has an overall beneficial effect on the local  
486 host genotype *jin1* in which it was selected.

487

488

## 489 **Discussion**

### 490 **Interaction between TuMV and the different defense pathways**

491 In this study we have explored the effect that mutations in host's different disease  
492 signaling pathways (*R* genes) or in recessive resistance genes (*S*) have in the outcome of  
493 virus evolution. Our experimental pathosystem consisted in two well studied  
494 components: the model plant *A. thaliana* and one virus with high prevalence in natural  
495 populations on this host (Pagán *et al.* 2010), TuMV. Among the *R* genes, we have  
496 included in our study genes involved in the SA, JA/ET and RNA-silencing pathways,  
497 among the *S* genes, we have included heat shock proteins, transcription factors and  
498 components of the translation machinery. In a preliminary set of experiments, we  
499 established the similarities and differences in phenotypic responses of different plant  
500 mutant genotypes to TuMV infection. Our results were, in some cases, at odds with the  
501 expected phenotypes for *R* genes, being the results for *jin1* the most unexpected ones.  
502 *JASMONATE INSENSITIVE 1 (JINI)* is a negative regulator of SA-mediated defense  
503 responses, henceforth the mutant *jin1* has a constitutive expression of SAR (Laurie-Berry  
504 *et al.* 2006). Surprisingly, it turns out to be the most sensitive genotype to TuMV  
505 infection, showing enhanced symptoms of disease (phenotypic group G5). This may  
506 reflect the fact that the function of *R* genes, especially those involved in SAR and ISR,  
507 have been mostly defined in terms of plant interactions with biotrophic and necrotrophic  
508 bacteria and fungi but rarely in response to virus infections. Mutant genotypes only  
509 affecting components of the ISR pathway (*e.g.*, *coil-4*) behaved as wild-type plants in

510 response to TuMV infection, thus confirming previous reports that ISR was inefficient  
511 against viral infections (Ton et al. 2002; Loebenstein 2009; Pieterse *et al.* 2009).  
512 However, mutant *eds8-1*, which avoids ISR but enhances SAR (Love *et al.* 2007) turned  
513 out to be among the most resistant genotypes to infection (phenotypic group G1). In  
514 agreement with our findings of a variable response to SA-signaling, Singh *et al.* (2004)  
515 discussed examples of viruses in which SA-dependent responses to viral infection were  
516 strongly dependent on the virus used in the experiments: while viruses such as alfalfa  
517 mosaic virus, potato virus X or turnip vein clearing virus replication was inhibited by  
518 treating plants with SA, cucumber mosaic virus was apparently unaffected by the  
519 treatment and accumulated to normal levels.

520 The RNA-silencing pathway is considered as the main plant defense against viral  
521 pathogens (Voinnet 2001), with *DICER LIKE 2 (DCL2)* and *DICER LIKE 4 (DCL4)*  
522 encoding for the two dicer enzymes responsible for generating the 22- and 21-nucleotides  
523 long antiviral siRNAs. Therefore, the double mutant *dcl2 dcl4* was expected to show a  
524 highly sensitive response to TuMV infection. However, infected plants were, overall,  
525 hardly distinguishable from the WT plants in their response to infection (Fig. S2 and Fig.  
526 S3). A possible explanation would be the strong suppressor activity of HC-Pro in the WT  
527 plants that effectively counteracts the defense mechanism (Kaschau & Carrington 2001).  
528 Indeed, it has been shown that the outcome of the interplay between plant RNA-silencing  
529 response and potyvirus is mostly driven by the efficiency of the viral HC-Pro suppression  
530 activity (Li *et al.* 2007; Torres-Barceló *et al.* 2008).

531 The response to infection of genotypes carrying mutations in *S* genes was, in  
532 general, consistent with the *a priori* expectation. Mutant *i4g2*, that is defective for the  
533 eIF4(iso)E factor, shows a strong resistance to TuMV infection (Nicaise *et al.* 2007;  
534 Charron *et al.* 2008), belonging to phenotypic group G1. Likewise, in agreement with

535 previous descriptions, mutant *dbp2* shows enhanced resistance to potyvirus infection  
536 (Castelló *et al.* 2011), belonging to phenotypic group G3. Finally, mutant *hsp90-1* turns  
537 out to show a response to TuMV infection equivalent to the WT plants, likely due to its  
538 functional redundancy with other heat-shock proteins present in the cell that may be  
539 coopted by the virus to assist in their expected functions (Verchot 2012).

540 An interesting finding was the effect on TuMV replication of knocking down the  
541 expression of gen *P58<sup>IPK</sup>*. In mammals P58<sup>IPK</sup>, a tetratricopeptide repeat (TPR)-  
542 containing protein, is recruited by viruses (*e.g.*, influenza A virus) to inhibit interferon  
543 activation and cell death mediated by the dsRNA-activated protein kinase (PKR), thus  
544 favoring viral spread (Goodman *et al.* 2011). In our experiments, *p58<sup>IPK</sup>* mutant plants  
545 show enhanced tolerance to infection, showing weaker symptoms than WT plants despite  
546 accumulating viruses at the same level (Fig. S1). In sharp contrast, Bilgin *et al.* (2003)  
547 found that infection of *p58<sup>IPK</sup>*-silenced *Nicotiana benthamiana* and *A. thaliana* plants  
548 infected with tobacco mosaic virus lead to death. Given the limited information available  
549 from other plant-virus pathosystems, additional experiments would be necessary to shed  
550 light into the potential antiviral role in plants of this gene.

551 One side, yet important, conclusion of our study is that the generally accepted  
552 model of plant defense signaling pathways, mainly based in experiments done with  
553 bacteria and fungi, may not well describe the interaction between plants and viruses. By  
554 contrast, recessive resistances based on *S* genes seem to better explain differences in  
555 susceptibility to infection and viral accumulation, thus being more promising targets for  
556 future development of resistant plants.

557

558 **Evolution of specialist and generalist viral strategies depend on the host genotype**

559 The GFG and MA models of host-virus interaction modes represent the two ends of a  
560 continuum of possible outcomes (Agrawal & Lively 2002). The most relevant difference  
561 between both models regards the expected genetic heterogeneity in both host and virus  
562 populations. With a pure GFG interaction the susceptible host types are expected to  
563 disappear and the resistant types will dominate the population. *Vice versa*, the most  
564 virulent virus allele would drive to fixation at the cost of losing mild alleles. However,  
565 constitutive activation of defenses is known to be costly for *A. thaliana* [e.g., SA-related  
566 defense responses pay a fitness cost in absence of pathogens (Traw *et al.* 2007)] and high  
567 virulence usually comes with a cost in terms of pathogen's transmission (reviewed in  
568 Acevedo *et al.* 2019). Hence, a pure GFG strategy seems unlikely to be achieved. By  
569 contrast, with a pure MA interaction, negative frequency-dependent selection emerges,  
570 such that rare *A. thaliana* resistance alleles have advantage and, as a result, a genetic  
571 polymorphism shall be maintained (Schmid-Hempel 2011). Natural populations of *A.*  
572 *thaliana* contain considerable amount of genetic variability for tolerance (Pagán *et al.*  
573 2008) and for immunity-related genes (Todesco *et al.* 2010, van de Weyer *et al.* 2019),  
574 thus suggesting that an arms race between pathogens and plants should be going on yet it  
575 is unclear whether it may result in pure GFG or MA interactions or lie somewhere in  
576 between. Evolution experiments with such different pathosystems as TuMV/*A. thaliana*  
577 (González *et al.* 2019), *Octosporea bayeri*/*Daphnia magna* (Altermatt & Ebert 2008) and  
578 *Serratia marcescens*/*Caenorhabditis elegans* (Gibson *et al.* 2020; White *et al.* 2020) have  
579 produced congruent results in one aspect: parasites exposed to heterogeneous host  
580 populations evolved significantly lower virulence than parasites exposed to homogeneous  
581 host populations. However, a significant difference exists among pathosystems: while  
582 viruses exposed to genetically heterogeneous host populations evolved as no-cost



583 generalists, evolution of generalism in more complex parasites was constrained by a  
584 fitness tradeoff, as expected for the jack-of-all trades hypothesis (Bedhomme *et al.* 2015).

585 Our results, as well as those by Hillung *et al.* (2014) and González *et al.* (2019)  
586 have shown the evolution of significantly nested binary infection networks, a finding  
587 compatible with the existence of a combination of specialist and generalist viruses and of  
588 more permissive and resistant host genotypes. Indeed, these studies have also shown that  
589 more permissive hosts selected for more specialized viruses while more resistant hosts  
590 selected for more generalist viruses, here matching the predictions of the GFG model.  
591 Our observation of small yet significant modularity in the infection network was easily  
592 explained by convergent evolution of TuMV lineages evolved in the same host genotype.  
593 However, it has been recently shown in a long-term survey of the prevalence of different  
594 plant viruses in different hosts and habitats that nestedness and modularity in host-  
595 pathogen infection networks is possible due to the spatially patched distribution of  
596 habitats and temporal successions of plant species (Valverde *et al.* 2020): small spatial  
597 scales create modularity that coexist with global nestedness. This pattern may change  
598 spatially and temporally but remains stable over long evolutionary timescales.

599

## 600 **Role of natural selection**

601 We found evidences of significant genetic differentiation among TuMV lineages evolved  
602 in different plant genotypes. To test whether these differences were driven by selection  
603 we performed a Tajima's  $D$  test (Tajima 1989). The resulting  $D$  value was significative  
604 and negative, which is compatible with the action of purifying selection, the presence of  
605 slightly deleterious mutations segregating in the populations or fast population  
606 expansions (Yang 2006). How to distinguish between these explanations? In  
607 independent fast expanding populations, many new mutations may be generated and

608 rising in frequency in each population, thus being observed as singletons, mutations  
609 present in only one of the many coexisting genomes in each evolving TuMV lineage.  
610 Singletons inflate the number of segregating sites and thus cause  $D < 0$ . Indeed, this is  
611 the case here: 54 out of the 71 observed variable sites are singletons, thus the observed  
612 pattern of molecular diversity among lineages evolved in the same host genotype and in  
613 different host genotypes is likely to be due to the fast expansions of viral populations.

614         However, we have found additional evidence supporting the action of positive  
615 selection: the existence of a number of convergent nonsynonymous mutations arising in  
616 independent lineages, some evolved in the same host genotype but some others rising in  
617 different host genotypes (Table S1 and Fig. S3) yet without a clear association with the  
618 particular signaling pathway or *S* gene being mutated (Table 1) nor the phenotypic cluster  
619 they belong to (Fig. 1). Interestingly, most of these convergent mutations happened in  
620 the *VPg* cistron, which turns out to be also the most variable one. *VPg* plays many  
621 essential roles in genome transcription (it is linked to the 5'-end of the viral genome and  
622 provides the hydroxyl group that primes the synthesis of the complementary strands by  
623 the viral RdRp), translation (directly interacts with the eukaryotic initiation factors  
624 eIF(iso)4E and eIF(iso)4G) and interacts with all other viral proteins (Bosque *et al.* 2014)  
625 and some other cell proteins (Martínez *et al.* 2016). Indeed, in previous evolution  
626 experiments with potyviruses, *VPg* has also been shown to be an important target of  
627 selection. For example, Agudelo-Romero *et al.* (2008) found that a single amino acid  
628 replacement in *VPg* was enough to largely increase TEV *I*, *VL* and *SS* in *A. thaliana*.  
629 Similarly, Gallois *et al.* (2010) found that *A. thaliana* plants with knock-out mutations in  
630 the *eIF(iso)4E*, *eIF(iso)4G1* and *eIF(iso)4G2* genes were resistant to TuMV infection.  
631 Two mutations in the *VPg* (E116Q and N163Y) were enough to overcome this resistance  
632 and return to the original infection phenotype, though yeast-two hybrid assays showed

633 that none of these mutations affected the binding of VPg with eIF(iso)4E. As a final  
634 example, one of the most extensively used resistance genes in pepper commercial  
635 cultivars against potato virus Y (PVY; genus *Potyvirus*, family *Potyviridae*) is the *pvr2*,  
636 which has many different alleles (Nicaise *et al.* 2007; Charron *et al.* 2008). The *pvr2*  
637 locus encodes for the eIF4E factor which, as mentioned above, physically interacts with  
638 VPg. Interestingly, all the resistance-breaking viral isolates found so far contain  
639 mutations in the *VPg* cistron (Duprat *et al.* 2002; Moury *et al.* 2004; Ayme *et al.* 2006)

640 Interestingly, one of the two mutations identified by Gallois *et al.* (2010),  
641 VPg/E116Q, affects the same protein domain that the two mutations we have identified  
642 and characterized (D113G and R118H). The mechanism why these two mutations may  
643 confer a selective advantage to TuMV lineages cannot be inferred from our studies. We  
644 found VPg/D113G in several lineages evolved in different host genotypes, while  
645 VPg/R118H was only found in the *jin1* lineages. Our assays failed to find a beneficial  
646 effect of VPg/D113G but confirmed the host-specific beneficial effect of VPg/R118H in  
647 *jin1* plants.

648 Unfortunately, due to economical constrains, we have not been able to exhaustively  
649 testing all observed mutations and, hence, several others may still be potential candidates  
650 for adaptive mutations. More specifically, we have not tested possible epistatic  
651 interactions among mutations fixed in the same genome. Three lineages carry more than  
652 one nonsynonymous mutation in *VPg* (*dbp2/L1* D113N and N115E, *eds8-1/L1* N115H  
653 and E116G, and *eds8-1/L4* H33Y, D113N and K121E) (Table S1). In addition, 25  
654 lineages carry additional nonsynonymous mutations in at least one other cistron besides  
655 *VPg* (Table S1). Two lineages have up to three additional nonsynonymous mutations:  
656 *cpr5-2/L5* that has P3/T318M-T326S CI/V148I and VPg/D113G and *dcl2 dcl4/L1* that  
657 has P1/V54A CI/I378V VPg/R118C and CP/S70N. Therefore, plenty of opportunities

658 for epistatic effects both within and among cistrons exist that will be evaluated in future  
659 experiments.

660

661

## 662 **Methods**

### 663 **Plants, virus and growth conditions**

664 A collection of 21 different *A. thaliana* mutants of the Col-0 accession were used for this  
665 study (Table 1). In all experiments described below, plants were all maintained in a BSL-  
666 2 climatic chamber under a photoperiod of 8 h light (LED tubes at PAR 90 - 100  
667  $\mu\text{mol}/\text{m}^2/\text{s}$ ) at 25 °C and 16 h dark at 20 °C.

668 Prior to the inoculation experiments, we created a large stock of TuMV infectious  
669 saps. Saps were obtained from TuMV-infected *N. benthamiana* Domin plants inoculated  
670 with the infectious plasmid p35STunos that contains a cDNA of TuMV genome  
671 (GeneBank accession AF530055.2) under the control of the cauliflower mosaic virus 35S  
672 promoter and the *nos* terminator (Chen *et al.* 2003) as described elsewhere (González *et*  
673 *al.* 2019; Corrêa *et al.* 2020). This TuMV sequence variant corresponds to the YC5  
674 isolate from calla lily (*Zantedeschia* sp) (Chen *et al.* 2003). After plants showed  
675 symptoms of infection, they were pooled frozen with liquid N<sub>2</sub> and homogenized into a  
676 fine powder using a Mixer Mill MM400 (Retsch GmbH, Haan, Germany). For  
677 inoculations, the necessary amount of power was diluted in inoculation buffer (50 mM  
678 phosphate buffer pH 7.0, 3% PEG6000, 10% Carborundum) and 5  $\mu\text{L}$  of the inoculum  
679 was gently rubbed into the plant leaves. Plants were all inoculated when reached growth  
680 stage 3.5 in the Boyes' scale (Boyes 2001). This synchronization ensures that they all  
681 were at the same phenological state when inoculated.

682

### 683 **Phenotyping infected plants**

684 The following five different traits were measured for each infected plant 18 dpi. (i)  
685 Change in dry weight ( $\Delta DW$ ) of the aerial part of infected plants, with a precision of 10  
686 mg, relative to the corresponding noninfected controls (Fig. S1A). (ii) Severity of  
687 symptoms ( $SS$ ) was evaluated in a semi-quantitative discrete scale (Fig 1B in Corrêa *et*  
688 *al.* 2020) ranging from zero for asymptomatic infections to four for plants showing a  
689 generalized necrosis and wilting (Fig. S1B). (iii) The area under the disease progress  
690 stairs ( $AUDPS$ ) that summarizes the speed at which the disease severity progresses in a  
691 group of plants (Fig. S1C) and takes values in the range zero and the total number of  
692 plants included in the assay (Simko & Piepho 2012). (iv) Infectivity measured as the  
693 number of symptomatic plants out of the number of inoculated plants 18 dpi ( $I$ ; Fig. S1D).  
694 And (v) viral load ( $VL$ ) measured by absolute RT-qPCR as the number of viral genomes  
695 per ng of total RNA in the plant as described below (Fig. S1E).

696 The five traits were not all independent but showed some significant pairwise  
697 positive correlations:  $AUDPS$  with  $I$  ( $r = 0.772$ , 19 df,  $P < 0.001$ ),  $SS$  ( $r = 0.807$ , 19 df,  $P$   
698  $< 0.001$ ) and  $VL$  ( $r = 0.472$ , 19 df,  $P = 0.031$ ), and  $I$  with  $SS$  ( $r = 0.746$ , 19 df,  $P < 0.001$ ).  
699 Basically,  $\Delta DW$  is orthogonal with the other four traits while the other four traits show  
700 some degree of association. Interesting is the case of  $VL$ , which is only (weakly)  
701 correlated to  $AUDPS$ .

702

### 703 **Experimental evolution**

704 Five TuMV lineages were evolved during 12 consecutive serial passages on each one of  
705 the nine selected mutant genotypes. To begin the evolution experiment, 10 21-days old  
706 *A. thaliana* plants per lineage, three leaves per plant, were inoculated as described above  
707 with the sap from *N. benthamiana*. Fourteen dpi, symptomatic *A. thaliana* plants were

708 harvested and used to prepare infectious saps as described above. These saps were 1/10  
709 diluted in inoculation buffer and used to inoculate the next batch of plants.

710

### 711 **Total RNA extractions**

712 Tissue from each pool of infected plants per lineage, ecotype and serial passage was  
713 collected, frozen with liquid N<sub>2</sub> and preserved at -80 °C until it was homogenized into  
714 fine powder using a Mixer Mill MM400. Next, an aliquot of approximately 100 mg of  
715 grounded tissue per sample for which viral load was quantified, was used for total RNA  
716 (RNA<sub>t</sub>) extraction performed with the Agilent Plant RNA isolation Mini kit (Agilent  
717 Technologies, Santa Clara CA, USA). Aliquots of RNA<sub>t</sub> per each sample were separated  
718 and their concentration adjusted at 50 ng/μL to estimate viral accumulation by RT-qPCR  
719 (see below).

720

### 721 **Quantification of *VL***

722 *VL* of each plant sample per lineage, ecotype and selected passage was quantified by  
723 absolute real-time quantitative RT-PCR (RT-qPCR) using standard curves and the  
724 primers TuMV F117 forward (5'-CAATACGTGCGAGAGAAGCACAC-3') and F118  
725 reverse (5'-TAACCCCTTAACGCCAAGTAAG-3') that amplify a 173 nucleotides  
726 fragment from the *CP* cistron of TuMV genome, as previously described (Corrêa *et al.*  
727 2020). Briefly, standard curves were constructed using ten serial dilutions of the TuMV  
728 genome, that was synthesized by *in vitro* transcription as detailed previously (Cervera *et*  
729 *al.* 2018), in RNA<sub>t</sub> extract obtained from healthy *A. thaliana* plants used as control in the  
730 experiments. Amplification reactions were run in a 20 μL volume using the GoTaq 1-  
731 Step RT-qPCR System (Promega, Madison WI, USA) and the recommended  
732 manufacturer's instructions as described (Cervera *et al.* 2018) in an ABI StepOne Plus

733 Real-time PCR System (Applied Biosystems, Foster City CA, USA). The cycling  
734 conditions consisted in: an RT phase of 5 min at 42 °C and 10 min at 95 °C followed by  
735 a PCR stage consisting in 40 cycles of 5 s at 95 °C and 34 s at 60 °C; and the final melt  
736 curve profile analysis that consisted in 15 s at 95 °C, 1 min at 60°C and 15 s at 95 °C.  
737 Negative controls consisted in healthy RNA<sub>at</sub> plant extract (non infected control) and  
738 water. Quantitative reactions were run as three technical replicates per sample and results  
739 were analysed using the StepOne software 2.2.2 (Applied Biosystems).

740

#### 741 **TuMV genome amplifications**

742 Evolved viral genomes of the passage 12 from each lineage and ecotype were amplified  
743 by high-fidelity RT-PCR by using the AccuScript Hi-Fi (Agilent Technologies) reverse  
744 transcriptase and Phusion DNA polymerase (Thermo Scientific, Waltham MA, USA)  
745 following the manufacturer's instructions. Each complete TuMV genome was amplified  
746 into three overlapping amplicons of 3114 (5' fragment R1), 3697 (central region R2) and  
747 3287 nucleotides (3' fragment R3) using three primer sets. For RT reactions an aliquot  
748 of the corresponding RNA<sub>at</sub> (150-300 ng) was mix with 0.25 µM of the 1R-P3 (5'-  
749 CGAGTAGTATCTTATAGCACAGCGCTCCGACC-3'), 2R-NIa (5'-  
750 TGTCTGGAATCGGTAGCAAATGTAGCTGAGTTGTG-3') or 3R-polyAR (5'-  
751 TTTTTTTTTTTTTTTTTTTTGTCCCTTGCATCATATCAAATG-3') primer to  
752 synthesize the R1, R2 or R3 cDNA fragment, respectively, that were denatured 5 min at  
753 65 °C and cooled on ice. Then it was added a mix containing AccuScript Hi-Fi 1× Buffer,  
754 1 mM of dNTPs, 8 mM of DTT, 4U of Ribolock RNase inhibitor (Thermo Scientific) and  
755 0.5 µL of AccuScript Hi-Fi (Agilent Technologies) in a 10 µL volume. RT reactions  
756 consisted in a step of 90 min at 42 °C to synthesize the cDNA followed by an incubation  
757 of 5 min at 70 °C to inactivate the enzyme. PCR reactions were performed in a 50 µL

758 volume containing a mix of 1× Phusion Buffer, 0.4 μM of dNTPs, 0.2 μM of each primer,  
759 0.5-1 μL of DMSO, 2U of Phusion DNA polymerase (Thermo Scientific) and 1 μL of the  
760 corresponding RT reaction. R1 fragment was amplified using the primer set 1F-5UTR  
761 (5'-GCAAACGCAGACCTTTCGAAGCACTCAAGC-3') and 1R-P3 and the following  
762 PCR conditions: an initial denaturation of 30 s at 98 °C, 3 cycles of 10 s at 98 °C, 20 s at  
763 67 °C and 2 min at 72 °C, 3 cycles of 10 s a 98 °C, 20 s at 65 °C and 2 min at 72 °C, and  
764 32 cycles of 10 s at 98 °C, 20 s at 63 °C and 2 min at 72 °C, followed by a final extension  
765 step of 5 min at 72 °C. Fragments R2 and R3 were amplified with primer set 2F-P3 (5'-  
766 TGGGAGCTTGCGGATGGTGGATACACAATTC-3') and 2R-NIa or 3F-NIa (5'-  
767 CTCGTTATATGGAGTCGGTTTCGGACCACTCATAT-3') and 3R-polyAR,  
768 respectively and a PCR with the same denaturation and extension steps than the fragment  
769 R1 but different amplification steps: an stage consisting in 15 cycles of 10 s at 98 °C, 20  
770 s at 67 °C and 2 min at 72 °C followed by 23 cycles of 10 s at 98 °C, 20 s at 65 °C and 2  
771 min at 72 °C for fragment R2, while 15 cycles of 10 s at 98 °C, 20 s at 67 °C and 2 min at  
772 72 °C followed by 23 cycles of 10 s at 98 °C, 20 s at 65 °C and 2 min at 72 °C for fragment  
773 R3. PCR products were purified with the MSB Spin PCRapace Kit (Stratagene Molecular,  
774 Coronado CA, USA) and then Sanger-sequenced. Full-length consensus viral sequences  
775 were obtained assembling the sequences of the three amplified products by using the  
776 Genious R9.0.2 program.

777

### 778 **Construction of TuMV *VPg* mutants**

779 Mutants in the *VPg* cistron were synthesized by long inverse site-directed PCR  
780 mutagenesis using the QuickChange II XL Kit (Stratagene, San Diego CA, USA)  
781 following the manufacturer's instructions using p35STunos as template. Also, mutagenic  
782 primers were designed following the manufacturer's recommendations. Primer set cpr5-



783 2F (5'-GGAGGATGAGTTGGGTCCAAATGAAATACGTGT-3') and cpr5-2R (5'-  
784 ACACGTATTTTCATTTGGACCCAACATCCTCC-3') was used to generate the  
785 A6238G (D113G) mutant while primer set jin1F (5'-  
786 GGATCCAAATGAAATACATGTGAATAAGACAATTC-3') and jin1R (5'-  
787 GAATTGTCTTATTCACATGTATTTTCATTTGGATCC-3') to obtain the G6253A  
788 (R118H) mutant. PCR protocol consisted in: a denaturation step of 2 min at 95 °C  
789 followed by 20 cycles of 20 s at 95 °C, 10 s at 60 °C and 7 min at 68 °C and a final  
790 extension of 5 min at 68 °C. After *DpnI* digestion and transformation of electrocompetent  
791 *Escherichia coli* DH5 $\alpha$ , the presence of the desired mutations in the infectious clone and  
792 the absence of undesired nucleotide changes was confirmed by sequencing.

793

#### 794 **Bioassays of the TuMV VPg mutants**

795 The infectivity, viability and pathogenicity of both VPg TuMV mutants was confirmed  
796 by performing three independent bioassays. In each experiment, three batches of 24 *A.*  
797 *thaliana* plants (three-weeks old) of genotypes wild-type, *cpr5-2* and *jin1* were inoculated  
798 with the wild-type TuMV plasmid clone used as reference and with plasmids of each of  
799 the TuMV VPg mutants, while another two batches of 24 plants from *cpr5-2* or *jin1*  
800 genotypes were inoculated with the WT TuMV plasmid and the corresponding plasmid  
801 of the TuMV VPg mutant, the VPg/D113G mutant in the case of the *cpr5-2* ecotype and  
802 that of VPg/R118H for the *jin1* genotype. *A. thaliana* were inoculated by abrasion of  
803 three leaves applying equal amounts of the plasmid inoculum, a total of approximately 7  
804  $\mu$ g per plant distributed in 3  $\mu$ L per leaf. Plasmids were previously purified by Midiprep  
805 using the NucleoBond Xtra Midi Kit (Macherey-Nagel, Düren, Germany) and  
806 resuspended in distilled water. Number of infected plants and symptom intensity were  
807 collected every day until 15 dpi.

808

## 809 **Statistical analyses**

810 All statistical analyses described hereafter were performed with SPSS version 26 software  
811 (IBM, Armonk, NY), unless otherwise indicated.

812 *AUDPS* (Fig. 2), *I* (Fig. 3) and *VL* (Fig. 4) data were fitted all together to a  
813 multivariate analysis of covariance (MANCOVA) model in which plant genotype (*G*)  
814 was the main factor, the independent evolution lineages (*L*) were nested within *G* and  
815 passage (*t*) was introduced in the model as a covariable. The full model equation thus  
816 reads:

$$817 \mathbf{P}_{ijk}(t) \sim \boldsymbol{\mu} + t + G_i + L(G)_{ij} + (t \times G)_i + [t \times L(G)]_{ij} + \boldsymbol{\varepsilon}_{ijk}, \quad (\text{Eq. 1})$$

818 where  $\mathbf{P}_{ijk}(t) = (AUDPS_{ijk}, I_{ijk}, VL_{ijk})^T$  is the vector of phenotypic traits observed at time *t*,  
819 for an individual infected plant *k* of evolutionary lineage *j* of genotype *i*,  $\boldsymbol{\mu}$  represents the  
820 vector of phenotypic grand mean values and  $\boldsymbol{\varepsilon}_{ijk}$  stands for the vector of errors assumed  
821 to be Gaussian distributed at every *t*. The significance of each factor, the covariable and  
822 their interactions was evaluated using the Wilks' *Λ* method. The magnitude of the effects  
823 was evaluated using the  $\eta_p^2$  statistic (proportion of total variability in the traits vector  
824 attributable to each factor in the model; conventionally, values of  $\eta_p^2 \geq 0.15$  are considered  
825 as large effects).

826 Rates of phenotypic evolution for *AUDPS* and *I* were estimated by fitting the time  
827 series data to a first-order autoregressive integrated moving-average, ARIMA(1,0,0),  
828 model (Elena and Sanjuán, 2005; González *et al.* 2019). The model equation fitted has  
829 the form:

$$830 Y_t - \rho_1 Y_{t-1} = Y_0 + \beta_Y t + \varepsilon_t, \quad (\text{Eq. 2})$$

831 where  $Y_k$  represents the variable being analyzed at passage *k*,  $\rho_1$  measures the degree of  
832 self-similarity in the time-series data (correlation between values at passages *t* and *t* - 1),

833  $\varepsilon_t$  represents the sampling error at passage  $t$ , and  $\beta_Y$  represents the linear dependency of  
834 variable  $Y$  with passage number, that is, the rate of phenotypic evolution. The rates of  
835 phenotypic evolution were further analyzed in the context of the mutated defense  
836 signaling pathway encoded by  $R$  genes or recessive resistances encoded by  $S$  genes. Rates  
837 of phenotypic evolution were fitted to a multivariate analysis of variance (MANOVA) in  
838 which the plant genotype serving as host for the evolutionary lineages ( $G$ ) was nested  
839 within the factor being analyzed (*i.e.*, the type of selection –hard vs soft-, the mode of  
840 resistance – $R$  vs  $S$ -, and whether mutations affected the SA-dependent, the JA/ET-  
841 dependent signaling or the RNA-silencing pathways; Table 1). The full model equation  
842 now thus reads:

$$843 \mathbf{B}_{ijk} \sim \boldsymbol{\mu} + X_{ij} + X(G)_{ij} + \boldsymbol{\varepsilon}_{ijk}, \quad (\text{Eq. 3})$$

844 where  $\mathbf{B}_{ijk} = (\beta_{AUDPS}, \beta)^T$  is the vector of rates of phenotypic evolution observed for the  
845  $k$  replicate lineage evolved in plant genotype  $j$  within the factor  $X_i$ , as above,  $\boldsymbol{\mu}$  represents  
846 the vector of grand mean values and  $\boldsymbol{\varepsilon}_{ijk}$  the vector of Gaussian errors.

847

#### 848 **Analysis of infection the network**

849 The first statistical approach consisted in fitting a logistic regression model to the  
850 presence/absence of symptoms data using GLM techniques with a Binomial probability  
851 distribution and a probit link function. The model equation reads as follows:

$$852 \text{probit}[f_{ijkl}(t)] \sim \phi + t + TG_i + t \times TG_i + LG_j + t \times LG_j + L(LG)_{jk} + t \times L(LG)_{jk} + \\ 853 (TG \times LG)_{ij} + t \times (TG \times LG)_{ij} + [TG \times L(LG)]_{ijk} + t \times [TG \times L(LG)]_{ijk} + \varepsilon_{ijkl}, \\ 854 \quad (\text{Eq. 4})$$

855 where  $f_{ijkl}(t)$  is the frequency of symptomatic plants  $t$  dpi in the test host genotype  $TG$ , for  
856 the viral lineage  $L$  evolved in the local host genotype  $LG$ .  $TG$  and  $LG$  were considered  
857 as orthogonal factors,  $L$  was nested within  $LG$  and dpi ( $t$ ) was treated as a covariable. The

858 model includes all main factors, their corresponding nested and factorial interactions as  
859 well as their interactions with the covariable.  $\phi$  represents the grand mean of the probit-  
860 transformed  $f$  values, and  $\varepsilon$  the error term assumed to be Binomial. The significance of  
861 the different factors was evaluated using likelihood-ratio tests (LRT).

862 For the second statistical approach, the binary infection matrix was analyzed using  
863 tools borrowed from the field of network biology to explore whether they show random  
864 associations between viral lineages and host genotypes, one-to-one associations,  
865 nestedness indicative of a GFG type of interaction, or modularity (Weitz *et al.* 2013). The  
866 statistical properties of the infection matrix were evaluated using the R package  
867 “bipartite” version 2.15 (Dormann *et al.* 2008) in R version 4.0.0 (R Core Team 2020)  
868 under RStudio 1.2.1335. Four different summary statistics were evaluated:  $T$  nestedness  
869 (Bascompte *et al.* 2003),  $Q$  modularity (Newman 2006) and the  $d'$  species-level (or  
870 Kullback-Leibler divergence) and  $H'_2$  network-level (or two-dimensional normalized  
871 Shannon entropy) specialization indexes (Blüthgen *et al.* 2006).  $H'_2$  ranges between zero  
872 and one for extreme generalists and specialists, respectively. Statistical significance of  
873 these statistics was evaluated using Bascompte *et al.* (2003) null model.

874

### 875 **The statistics of molecular evolution**

876 Treating each lineage as an observation and each host genotype as a subpopulation, we  
877 evaluated the average nucleotide diversity within host genotypes,  $\pi_S$ , the nucleotide  
878 diversity for the entire sample,  $\pi_T$ , the interhost genotypes nucleotide diversity,  $\delta_{ST}$ , and  
879 the estimate of the proportion of interhost genotypes nucleotide diversity, known as  
880 coefficient of nucleotide differentiation (Nei 1982),  $N_{ST} = \delta_{ST}/\pi_T$ . Standard deviations of  
881 estimates were inferred from 1000 bootstrap samples. All these computations were done  
882 using MEGA X (Kumar *et al.* 2018) and the lowest-BIC nucleotide substitution model

883 Kimura 2-parameters (Kimura 1980). Tajima's  $D$  test of selection (Tajima 1989) and its  
884 statistical significance were evaluated using DnaSP6 (Rozas *et al.* 2017).

885 The frequency of mutations ( $m$ ) per cistron ( $C$ ), relative to the length of the  
886 corresponding cistron, was fitted to the following logistic regression model using GLM  
887 techniques with a Binomial probability distribution and a probit link function:

$$888 \text{probit}(m_i) \sim \mu + C_i + \varepsilon_i \quad (\text{Eq. 5})$$

889 where  $\mu$  is the average genomic mutation frequency and  $i$  refers to the 10 cistrons in the  
890 main ORF.

891 The functional effect of mutations found in the *VPg* cistron were evaluated *in silico*  
892 using the SNAP2 algorithm (Hecht *et al.* 2015). The algorithm provides a functionality  
893 score and an accuracy index for each possible mutation affecting a coding sequence.  
894 Negative score values mean functional neutrality while positive values should be taken  
895 as indications of functional effects; the larger the values, the stronger the effect.

896

## 897 **References**

898 Acevedo MA, Dillemath FP, Flick AJ, Faldyn MJ, Elderd BD. 2019. Virulence-driven  
899 trade-offs in disease transmission: a meta-analysis. *Evolution* **73**: 636-647.

900 Agrawal A, Lively CM. 2002. Infection genetics: gene-for-gene versus matching-alleles  
901 models and all points in between. *Evol. Ecol. Res.* **4**: 79-90.

902 Agudelo-Romero P, Carbonell P, Pérez-Amador MA, Elena SF. 2008. Virus adaptation  
903 by manipulation of host's gene expression. *PLoS ONE* **3**: e2397.

904 Altermatt F, Ebert D. 2008. Genetic diversity of *Daphnia magna* populations enhances  
905 resistance to parasites. *Ecol. Lett.* **11**: 918-928.

906 Altizer S, Kaitala V, Laakso J, Ruokolainen L. 2006. Seasonality and the dynamics of  
907 infectious diseases. *Ecol. Lett.* **9**: 467-484.

- 908 Anttila J, 2015. Environmental variation generates environmental opportunist pathogen  
909 outbreaks. *PLoS ONE* **10**: e0145511.
- 910 Ayme V, Souche S, Caranta C, Jacquemond M, Chadoeuf J, Palloix A, Moury B (2006)  
911 Different mutations in the genome-linked protein VPg of *Potato virus Y* confer  
912 virulence on the *pvr2<sup>3</sup>* resistance in pepper. *Mol. Plant Microbe Interact.* **19**: 557-  
913 563.
- 914 Bascompte J, Jordano P, Melián CJ, Olesen JM. 2003. The nested assembly of plant-  
915 animal mutualistic networks. *Proc. Natl. Acad. Sci. USA* **100**: 9389-9387.
- 916 Bedhomme S, Hillung J, Elena SF. 2015. Emerging viruses: why are not jacks of all  
917 trades? *Curr Opin Virol* **10**: 1-6.
- 918 Bilgin DD, Liu Y, Schiff M, Dinesh-Kumar SP. 2003. *P58<sup>IPK</sup>*, a plant ortholog of double-  
919 stranded RNA-dependent protein kinase PKR inhibitor, functions in viral  
920 pathogenesis. *Dev. Cell* **4**: 651-661.
- 921 Blüthgen N, Menzel F, Blüthgen N. 2006. Measuring specialization in species interaction  
922 networks. *BMC Ecol.* **6**: 9.
- 923 Bosque G, Folch-Fortuny A, Picó J, Ferrer A, Elena SF. 2014. Topology analysis and  
924 visualization of *Potyvirus* protein-protein interaction network. *BMC Syst. Biol.* **8**:  
925 129.
- 926 Bouché N, Laressergues D, Gascioli V, Vaucheret J. 2006. An antagonistic function for  
927 *Arabidopsis* DCL2 in development and a new function for DCL4 in generating viral  
928 siRNAs. *EMBO J.* **25**: 3347-3356.
- 929 Boyes DC. 2001. Growth stage-based phenotypic analysis of *Arabidopsis*: a model for  
930 high throughput functional genomics in plants. *Plant Cell* **13**: 1499-1510.
- 931 Brown JKM, Tellier A. 2011. Plant-parasite coevolution: bridging the gap between  
932 genetics and ecology. *Annu. Rev. Phytopathol.* **49**: 345-367.

- 933 Cao H, Bowling SA, Gordon AS, Dong X. 1994. Characterization of an *Arabidopsis*  
934 mutant that is nonresponsive to inducers of systemic acquired resistance. *Plant Cell*  
935 **6**: 1583-1592.
- 936 Carr JP, Lewsey MG, Palukaitis P. 2010. Signaling in induced resistance. *Adv. Virus Res.*  
937 **76**: 57-121.
- 938 Castelló MJ, Carrasco JL, Navarrete-Gómez M, Daniel J, Granot D, Vera P. 2011. A plant  
939 small polypeptide is a novel component of DNA-binding protein phosphatase 1-  
940 mediated resistance to *Plum pox virus* in *Arabidopsis*. *Plant Physiol.* **157**: 2206-  
941 2215.
- 942 Cervera H, Ambrós S, Bernet GP, Rodrigo G, Elena SF. 2018. Viral fitness correlates  
943 with the magnitude and direction of the perturbation induced in the host's  
944 transcriptome: the tobacco etch potyvirus-tobacco case study. *Mol. Biol. Evol.* **35**:  
945 1599-1615.
- 946 Charron C, Nicolai M, Gallois JL, Robaglia C, Moury B, Palloix A, Caranta, C. 2008.  
947 Natural variation and functional analyses provide evidence for coevolution between  
948 plant eIF4E and potyviral VPg. *Plant J.* **54**: 56-68.
- 949 Chen CC, Chao CH, Chen CC, Yeh SD, Tsai HT, Chang CA. 2003. Identification of  
950 *Turnip mosaic virus* isolates causing yellow stripe and spot on calla lily. *Plant Dis.*  
951 **87**: 901-905.
- 952 Corrêa RL, Sanz-Carbonell A, Kogej Z, Müller SY, Ambrós S, López-Mogollón S,  
953 Gómez G, Baulcombe DC, Elena SF. 2020. Viral fitness determines the magnitude  
954 of transcriptomic and epigenomic reprogramming of defense responses in plants.  
955 *Mol. Biol. Evol.* **37**: 1866-1881.

- 956 Cui H, Qiu J, Zhou Y, Bhandari DD, Zhao C, Bautor J, Parker JE. 2018. Antagonism of  
957 transcription factor MYC2 by EDS1/PAD4 complexes bolsters salicylic acid defense  
958 in *Arabidopsis* effector-triggered immunity. *Mol. Plant* **11**: 1053-1066.
- 959 Dormann CF, Gruber B, Fruend J. 2008. Introducing the bipartite package: analyzing  
960 ecological networks. *R News* **8**: 8-11.
- 961 Dormann CF, Strauss R. 2014. A method for detecting modules in quantitative bipartite  
962 networks. *Meth. Ecol. Evol.* **5**: 9-98.
- 963 Duprat A, Caranta C, Revers F, Menand B, Browning KS, Robaglia C. 2002. The  
964 *Arabidopsis* eukaryotic initiation factor (iso)4E is dispensable for plant growth but  
965 required for susceptibility to potyviruses. *Plant J.* **32**: 927-934.
- 966 Elena SF, Sanjuán R. 2005. RNA viruses as complex adaptive systems. *BioSystems* **81**:  
967 31-41.
- 968 Flor HH. 1956. The complementary genetic systems in flax and flax rush. *Adv. Genet.* **8**:  
969 29-54.
- 970 Frank SA. 1993. Specificity versus detectable polymorphism in host-parasite genetics.  
971 *Proc. R. Soc. B* **254**: 191-197.
- 972 Gallois JL, Charron C, Sánchez F, Pagny G, Houvenaghel MC, Moretti A, Ponz F, Revers  
973 F, Caranta C, German-Retana, S. 2010. Single amino acid changes in the turnip  
974 mosaic virus viral genome-linked protein (VPg) confer virulence towards  
975 *Arabidopsis thaliana* mutants knocked out for eukaryotic initiation factors  
976 eIF(iso)4E and eIF(iso)4G. *J. Gen. Virol.* **91**: 288-293.
- 977 Gibson AK, Baffoe-Bonnie H, Penley MJ, Lin J, Owens R, Khalid A, Morran LT. 2020.  
978 The evolution of parasite host range in heterogeneous host populations. *J. Evol. Biol.*  
979 **33**: 773-782.



- 980 González R, Butković A, Elena SF. 2019. Role of host genetic diversity for susceptibility-  
981 to-infection in the evolution of virulence of a plant virus. *Virus Evol.* **5**: vez024.
- 982 Goodman AG, Tanner BCW, Chang ST, Esteban M, Katze MG. 2011. Virus infection  
983 rapidly activates the P58<sup>IPK</sup> pathway, delaying peak kinase activation to enhance viral  
984 replication. *Virology* **417**: 27-36.
- 985 Gupta V, Willits MG, Glazebrook J. 2000. *Arabidopsis thaliana* EDS4 contributes to  
986 salicylic acid (SA)-dependent expression of defense responses: evidence for  
987 inhibition of jasmonic acid signaling by SA. *Mol. Plant Microbe Interact.* **13**: 503-  
988 511.
- 989 Hecht M, Bromberg Y, Rost B. 2015. Better prediction of functional effects for sequence  
990 variants. *BMC Genomics* **16**: S1.
- 991 Hillung J, Cuevas JM, Valverde S, Elena SF. 2014. Experimental evolution of an  
992 emerging plant virus in host genotypes that differ in their susceptibility to infection.  
993 *Evolution* **68**: 2467-2480.
- 994 Hughes WHO, Boomsma JJ. 2006. Does genetic diversity hinder parasite evolution in  
995 social insect colonies? *J. Evol. Biol.* **19**: 132-143.
- 996 Kachroo P, Chandra-Shekara AC, Klessig DF. 2006. Plant signal transduction and  
997 defense against viral pathogens. *Adv. Virus Res.* **66**: 161-191.
- 998 Kaschau K, Carrington JC. 2001. Long-distance movement and replication maintenance  
999 functions correlate with silencing suppression activity of potyviral HC-Pro. *Virology*  
1000 **285**: 71-81.
- 1001 Kimura M. 1980. A simple method for estimating evolutionary rate of base substitutions  
1002 through comparative studies of nucleotide sequences. *J. Mol. Evol.* **16**: 111-120.
- 1003 Kumar S, Stecher G, Li M, Knyaz C, Tamura K. 2018. MEGA X: molecular evolutionary  
1004 genetics analysis across computing platforms. *Mol. Biol. Evol.* **35**: 1547-1549.

- 1005 Lalić J, Agudelo-Romero P, Carrasco P, Elena SF. 2010. Adaptation of tobacco etch  
1006 Potyvirus to a susceptible ecotype of *Arabidopsis thaliana* capacitates it for systemic  
1007 infection of resistant ecotypes. *Phil. Trans. R. Soc. B* **65**: 1997-2008.
- 1008 Laurie-Berry N, Joardar V, Street IH, Kunkel BN. 2006. The *Arabidopsis thaliana*  
1009 *JASMONATE INSENSITIVE 1* gene is required for suppression of salicylic acid-  
1010 dependent defenses during infection by *Pseudomonas syringae*. *Mol. Plant Microbe*  
1011 *Interact.* **19**: 789-800.
- 1012 Lin SS, Wu HW, Jan FJ, Hou RF, Yeh SD. 2007. Modifications of the helper component-  
1013 protease of *Zucchini yellow mosaic virus* for generation of attenuated mutants for  
1014 cross protection against severe infection. *Phytopathology* **97**: 287-296.
- 1015 Loebenstein G. 2009. Local lesions and induced resistance. *Adv. Virus Res.* **75**: 73-117.
- 1016 Love AJ, Laval V, Geri C, Laird J, Tomos AD, Hooks MA, Milner JJ. 2007. Components  
1017 of *Arabidopsis* defense- and ethylene-signaling pathways regulate susceptibility to  
1018 *Cauliflower mosaic virus* by restricting long-distance movement. *Mol. Plant Microbe*  
1019 *Interact.* **20**: 659-670.
- 1020 Mäkinen K. 2019. Plant susceptibility genes as a source for potyvirus resistance. *Ann.*  
1021 *Appl. Biol.* **173**: 122-129.
- 1022 Martínez F, Rodrigo G, Aragonés V, Ruiz M, Lodewijk I, Fernández U, Elena SF, Daròs  
1023 JA. 2016. Interaction network of tobacco etch potyvirus NIa protein with the host  
1024 proteome during infection. *BMC Genomics* **17**, 1
- 1025 Mine A, Nobori T, Salazar-Rodon MC, Winkelmüller TM, Anver S, Becker D, Tsuda K.  
1026 2017. An incoherent feed-forward loop mediates robustness and tunability in a plant  
1027 immune network. *EMBO Rep.* **18**: 464-476.
- 1028 Moury B, Morel C, Johansen E, Guilbaud L, Souche S, Ayme V, Caranta C, Palloix A,  
1029 Jacquemond M. 2004. Mutations in Potato virus Y genome-linked protein determine

- 1030 virulence towards recessive resistances in *Capsicum annuum* and *Lycopersicon*  
1031 *hirsutum*. *Mol. Plant Microbe Interact.* **17**: 322-329.
- 1032 Nawrath C, Heck, S, Parinthawong N, Métraux JP. 2002. *EDS5*, an essential component  
1033 of salicylic acid-dependent signaling for disease resistance in *Arabidopsis*, is a  
1034 member of the MATE transporter family. *Plant Cell* **14**: 275-286.
- 1035 Nawrath C, Métraux JP. 1999. Salicylic acid induction-deficient mutants of *Arabidopsis*  
1036 express PR-2 and PR-5 and accumulate high levels of camalexin after pathogen  
1037 inoculation. *Plant Cell* **11**: 1393-1404.
- 1038 Nei M. 1982. Evolution of human races at the gene level. In *Human Genetics, part A: the*  
1039 *Unfolding Genome* (ed. B. Bonné-Tamir). Alan R. Liss, New York.
- 1040 Newman MEJ. 2006. Modularity and community structure in networks. *Proc. Natl. Acad.*  
1041 *Sci. USA* **103**: 8577-8582.
- 1042 Nicaise V, Gallois JL, Chafiai F, Allen LM, Schurdi-Levraud V, Browning KS,  
1043 Candresse T, Caranta C, Le Gall O, German-Retana S. 2007. Coordinated and  
1044 selective recruitment of eIF4E and eIF4G factors for potyvirus infection in  
1045 *Arabidopsis thaliana*. *FEBS Lett.* **581**: 1041-1046.
- 1046 Pagán I, Alonso-Blanco C, García-Arenal F. 2008. Host responses in life-history traits and  
1047 tolerance to virus infection in *Arabidopsis thaliana*. *PLoS Pathog.* **4**: e1000124.
- 1048 Pagán I, Fraile A, Fernández-Fueyo E, Montes N, Alonso-Blanco C, García-Arenal F.  
1049 2010. *Arabidopsis thaliana* as a model for the study of plant-virus co-evolution. *Phil.*  
1050 *Trans. R. Soc. B* **365**: 1983-1995.
- 1051 Parrat SR, Numminen E, Laine AL. 2016. Infectious disease dynamics in heterogeneous  
1052 landscapes. *Annu. Rev. Ecol. Evol. Syst.* **47**: 283-306.
- 1053 Pfenning K. 2001. Evolution of pathogen virulence: the role of variation in host  
1054 phenotype. *Proc. R. Soc. B* **268**: 755-760.

- 1055 Pieterse CMJ, León-Reyes A, van der Ent S, van Wees SC. 2009. Networking by small-  
1056 molecule hormones in plant immunity. *Nat. Chem. Biol.* **5**: 308-316.
- 1057 Pieterse CMJ, van der Does D, Zamioudis C, León-Reyes A, van Wees SCM. 2012.  
1058 Hormonal modulation of plant immunity. *Annu. Rev. Cell Dev. Biol.* **28**: 489-521.
- 1059 Rozas J, Ferrer-Mata A, Sánchez-del Barrio JC, Guirao-Rico S, Librado P, Ramos-Osins  
1060 SE, Sánchez-Gracia A. 2017. DnaSP 6: DNA sequence polymorphism analysis of  
1061 large data sets. *Mol. Biol. Evol.* **34**: 3299-3302.
- 1062 Schmid-Hempel P. 2011. *Evolutionary Parasitology*. Oxford University Press, Oxford:  
1063 UK, pp. 259-272.
- 1064 Schmid-Hempel P, Koella JC. 1994. Variability and its implications for host-parasite  
1065 interactions. *Parasitol. Today* **10**: 98-102.
- 1066 Simko I, Piepho HP. 2012. The area under the disease progress stair: calculation,  
1067 advantage, and application. *Phytopathology* **102**: 381-389.
- 1068 Singh DP, Moore CA, Gilliland A, Carr JP. 2004. Activation of multiple antiviral defence  
1069 mechanisms by salicylic acid. *Mol. Plant Pathol.* **5**: 57-63.
- 1070 Sofer L, Cabanillas D, Gayral M, Téplier R, Pouzoulet J, Ducousso M, Dufin L, Bréhélin  
1071 C, Ziegler-Graff V, Brault V, Revers Frédéric. 2017. Identification of host factors  
1072 potentially involved in *RTM*-mediated resistance during potyvirus long distance  
1073 movement. *Arch. Virol.* **162**: 1855-1865.
- 1074 Soosaar JLM, Burch-Smith TM, Dinesh-Kumar SP. 2005. Mechanisms of plant  
1075 resistance to viruses. *Nat. Rev. Microbiol.* **3**: 789-799.
- 1076 Tajima F. 1989. Statistical methods for testing the neutral mutation hypothesis by DNA  
1077 polymorphism. *Genetics* **123**: 585-595.

- 1078 Thines B, Katsir L, Melotto M, Niu Y, Mandaokar A, Liu G, Nomura K, He SY, Howe  
1079 GA, Browse J. 2007. JAZ repressor proteins are targets of the SCF(COI1) complex  
1080 during jasmonate signalling. *Nature* **448**: 661-665.
- 1081 Todesco M, Balasubramanian S, Hu TT, Traw MB, Horton M, Epple P, Kuhns C,  
1082 Sureshkumar S, Schwartz C, Lanz C, Laitinen RAE, Huang Y, Chory J, Lipka V,  
1083 Borevitz JO, Dangl JL, Bergelson J, Nordborg M, Weigel D. 2010. Natural allelic  
1084 variation underlying a major fitness trade-off in *Arabidopsis thaliana*. *Nature* **465**:  
1085 632-636.
- 1086 Ton J, van Pelt JA, van Loon LC, Pieterse CMJ. 2002. Differential effectiveness of  
1087 salicylate-dependent and jasmonate/ethylene-dependent induced resistance in  
1088 *Arabidopsis*. *Mol. Plant Microbe Interact.* **15**: 27-34.
- 1089 Torres-Barceló C, Martín S, Daròs JA, Elena SF. 2008. From hypo- to hypersuppression:  
1090 effect of amino acid substitutions on the RNA-silencing suppressor activity of the  
1091 tobacco etch potyvirus HC-Pro. *Genetics* **180**: 1039-1049.
- 1092 Travisano M, Mongold, JA, Bennett, AF, Lenski RE. 1995. Experimental test of the roles  
1093 of adaptation, chance, and history in evolution. *Science* **267**: 87-90.
- 1094 Traw MB, Kniskern JM, Bergelson J. 2007. SAR increases fitness of *Arabidopsis*  
1095 *thaliana* in the presence of natural bacterial pathogens. *Evolution* **61**: 2444-2449.
- 1096 Truniger V, Aranda MA. 2009. Recessive resistance to plant viruses. *Adv. Virus Res.* **75**:  
1097 119-159.
- 1098 Valverde S, Vidiella B, Montañez R, Fraile A, Sacristán S, García-Arenal F. 2020.  
1099 Coexistence of nestedness and modularity in host-pathogen infection networks. *Nat.*  
1100 *Ecol. Evol.* **4**: 568-577.

- 1101 Van de Weyer AL, Monteiro F, Furzer OJ, Nishimura MT, Cevik V, Witek K, Jones JDG,  
1102 Dangl JL, Weigel D, Bemm F. 2019. A species-wide inventory of NLR genes and  
1103 alleles in *Arabidopsis thaliana*. *Cell* **178**: 1260-1272.
- 1104 Van Wees SCM, de Swart EAM, van Pelt JA, van Loon, LC, Pieterse CMJ. 2000.  
1105 Enhancement of induced disease resistance by simultaneous activation of salicylate-  
1106 and jasmonate-dependent defense pathways in *Arabidopsis thaliana*. *Proc. Natl.*  
1107 *Acad. Sci. USA* **97**: 8711-8716.
- 1108 Verchot J. 2012. Cellular chaperones and folding enzymes are vital contributors to  
1109 membrane bound replication and movement complexes during plant RNA virus  
1110 infection. *Front. Plant Sci.* **3**, 271.
- 1111 Voinnet O. 2001. RNA silencing as a plant immune system against viruses. *Trends Genet.*  
1112 **17**: 449-459.
- 1113 Weitz JS, Poisot T, Meyer JR, Flores CO, Valverde S, Sullivan MB, Hochberg ME. 2013.  
1114 Phage-bacteria infection networks. *Trends Microbiol.* **21**: 82-91.
- 1115 White PS, Choi A, Pandey R, Menezes A, Penley M, Gibson AK, de Roode J, Morran L.  
1116 2020. Host heterogeneity mitigates virulence evolution. *Biol. Lett* **16**: 20190744.
- 1117 Yang Z. 2006. *Computational Molecular Evolution*. Oxford University Press. Oxford:  
1118 UK, pp 262-264.
- 1119 Yang Z, Huang Y, Yang J, Yao S, Zhao K, Wang D, Qin Q, Bian Z, Li Y, Lan Y, Zhou  
1120 T, Wang H, Liu C, Wang W, Qi Y, Xu Z, Li Y. 2020. Jasmonate signaling enhances  
1121 RNA silencing and antiviral defense in rice. *Cell Host Microbe* **28**: 89-103.
- 1122 Zhou JM, Zhang Y. 2020. Plant immunity: danger perception and signaling. *Cell* **181**:  
1123 978-989.
- 1124
- 1125 **Data availability**

1126 Raw data will be available upon request.

1127

## 1128 **Acknowledgments**

1129 We thank Francisca de la Iglesia and Paula Agudo for excellent technical assistance and  
1130 the rest of the EvolSysVir lab members for fruitful discussions. This work was supported  
1131 by grant PID2019-103998GB-I00 (Agencia Estatal de Investigación - FEDER) and  
1132 PROMETEU2019/012 (Generalitat Valenciana) to S.F.E.

1133

## 1134 **Author contributions**

1135 S.F.E. conceived the study, analyzed the data and wrote the paper. R.N., S.A., F.M.,  
1136 B.W., and J.L.C. performed all the experiments.

1137

## 1138 **Competing interests**

1139 The authors declare no competing interests.

1140

1141 **Figures and Tables**

1142

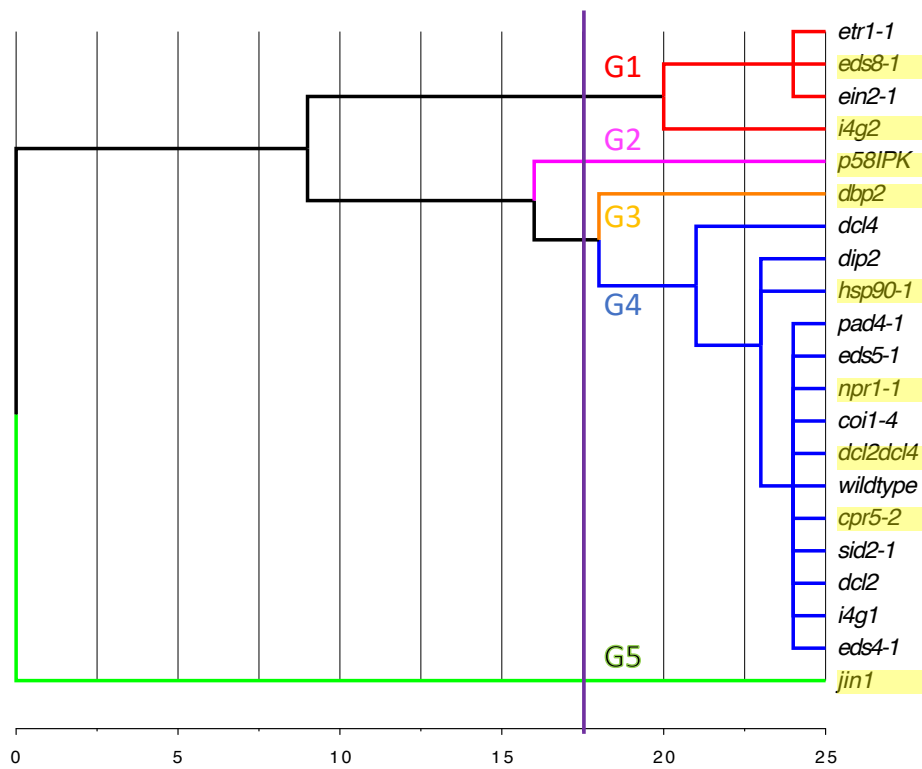

**Fig. 1.** Neighbor-joining clustering of the 21 mutant genotypes of Arabidopsis according to their phenotypic similarity in response to TuMV infection. Genotypes selected as hosts for the evolution experiments are highlighted in yellow.

1143



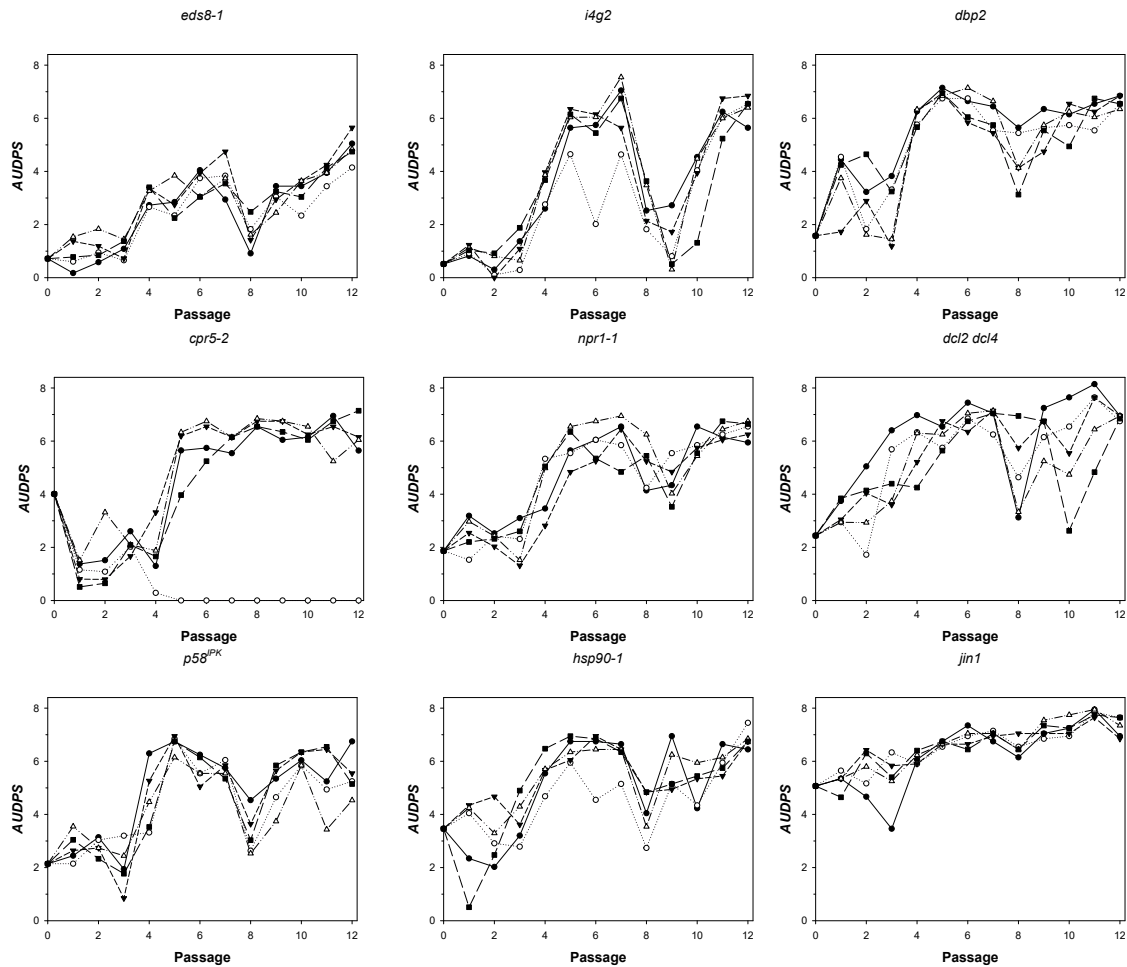

**Fig. 2.** Evolution of disease progression (*AUDPS*) along the serial passages of experimental evolution on each different host genotype. Different symbols and lines represent the independent evolutionary lineages. Panels are arranged from the most resistant genotype (*eds8-1*) to the most sensitive one (*jin1*) according to the groups defined in Fig. 1.

1144

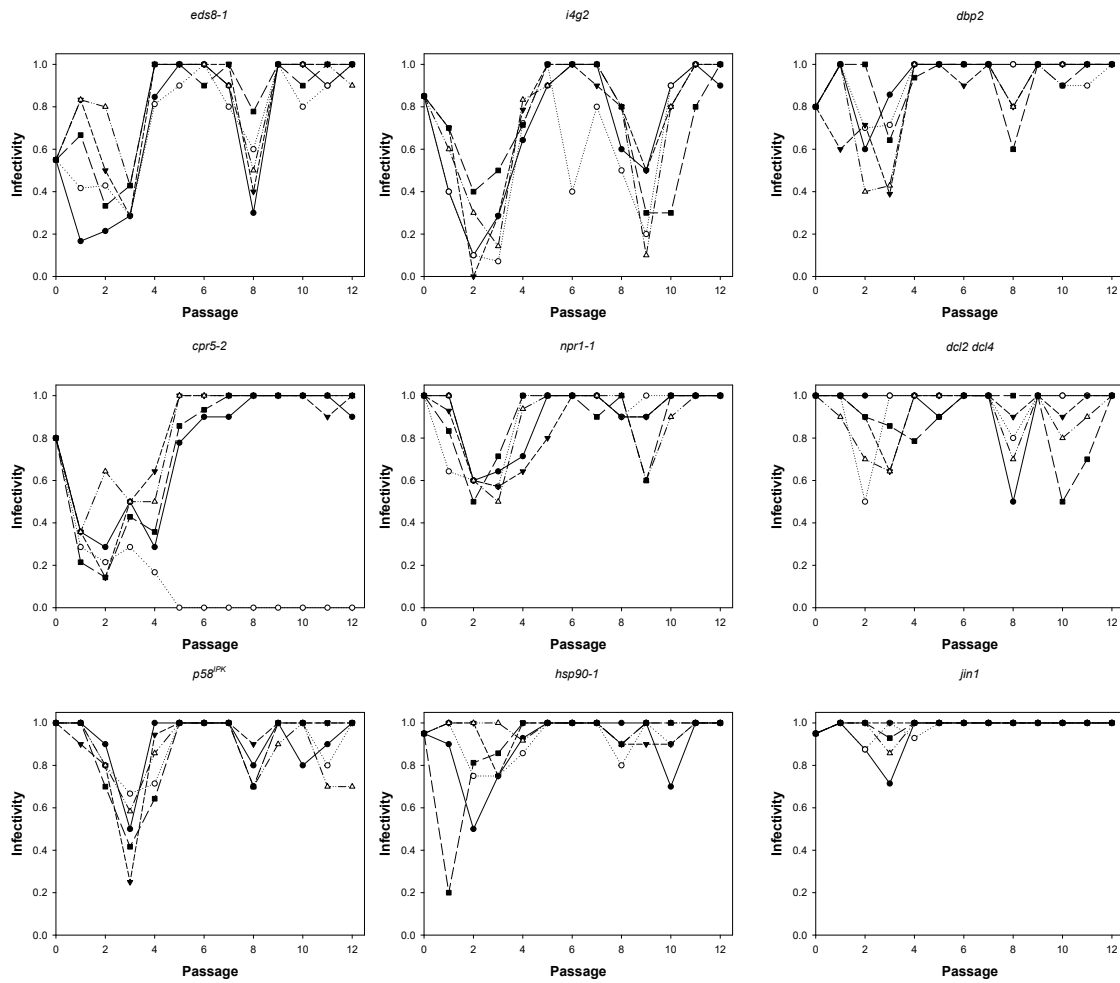

**Fig. 3.** Evolution of infectivity ( $I$ ) along the serial passages of experimental evolution on each different host genotype. Different symbols and lines represent the independent evolutionary lineages. Panels are arranged from the most resistant genotype (*eds8-1*) to the most sensitive one (*jin1*) according to the groups defined in Fig. 1.

1145

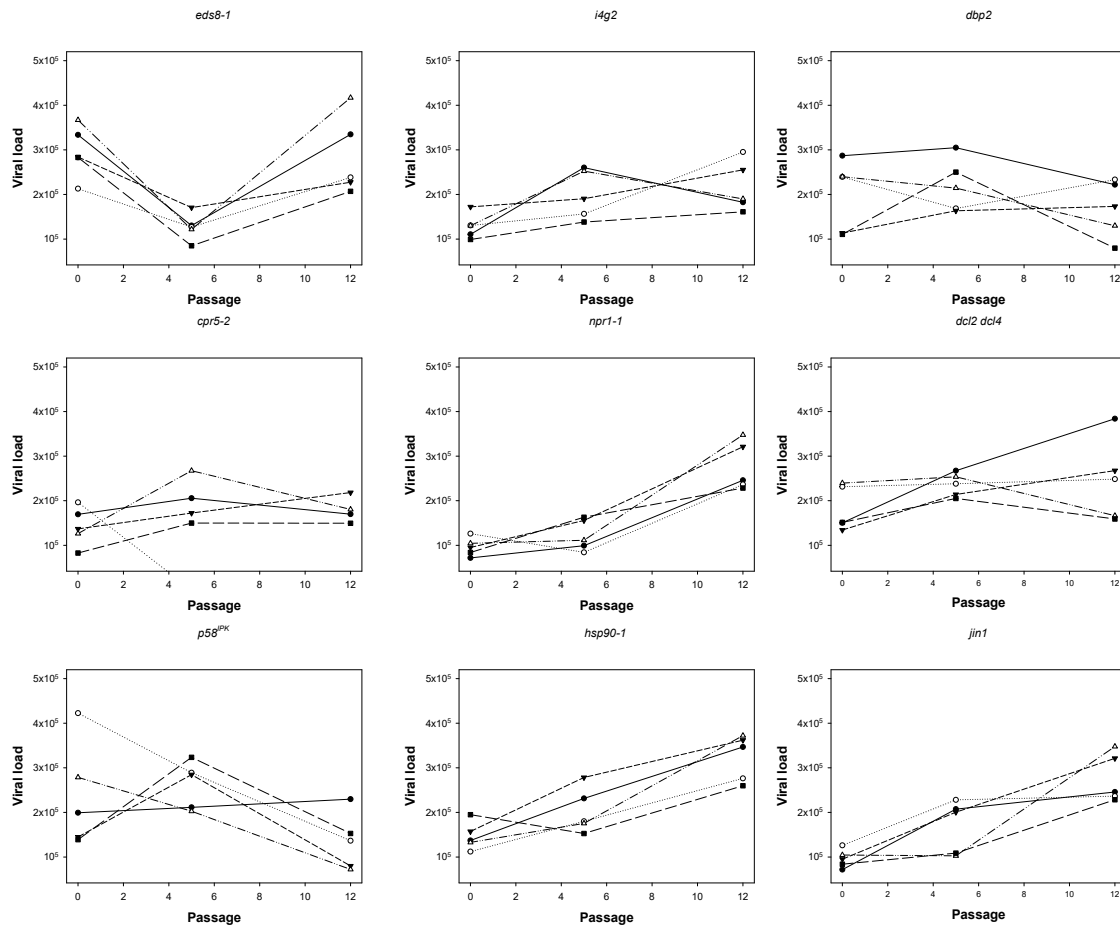

**Fig. 4.** Evolution of viral load ( $VL$ ) along the serial passages of experimental evolution on each different host genotype. Different symbols and lines represent the independent evolutionary lineages. Panels are arranged from the most resistant genotype (*eds8-1*) to the most sensitive one (*jin1*) according to the groups defined in Fig. 1.

1146

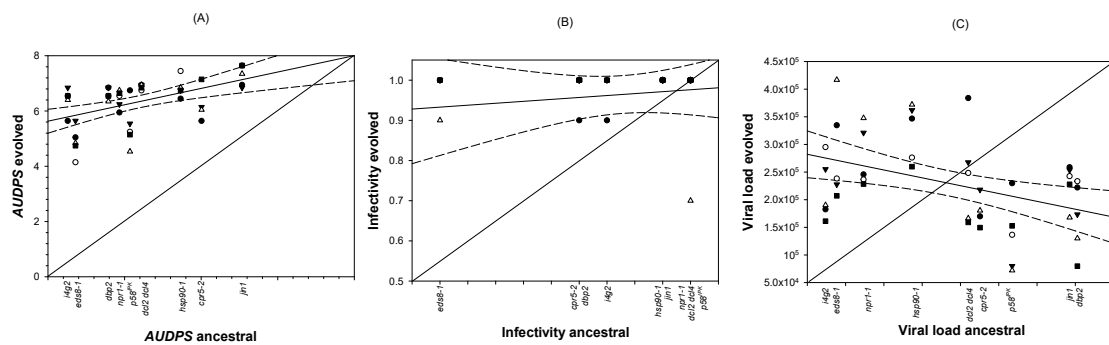

**Fig. 5.** Test of the contribution of historical contingency to the observed pattern of adaptation of TuMV to the different Arabidopsis genotypes. (A) Evolved vs ancestral values for  $AUDPS$ , (B) for  $I$ , and (C) for  $VL$ . The diagonal lines represent the null hypothesis of historical differences being fully preserved despite adaptation. The solid lines represent the linear regression of the data (dashed lines represent the 95% CI for the regression lines).

1147

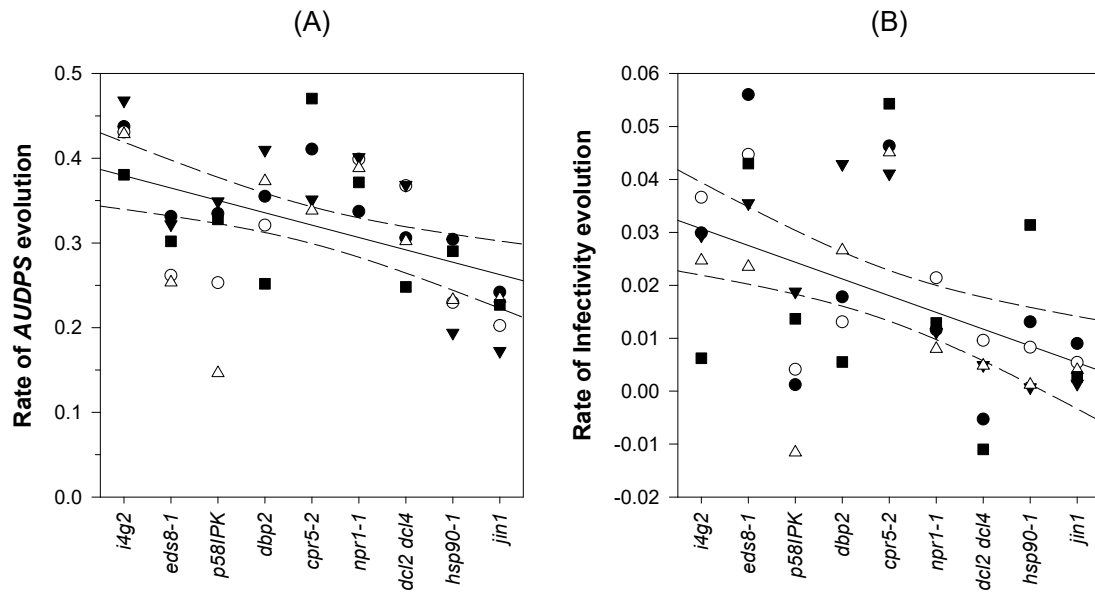

**Fig. 6.** Estimated rates of evolution for *AUDPS* (A) and *I* (B) obtained from the fitting of an ARIMA(1,0,0) model (Eq. 2) to the data shown in Fig. 2 and Fig. 3, respectively. Different symbols represent different independent lineages evolved on the corresponding host genotype. Solid lines represent the linear regression of the data; dashed lines the 95% confidence intervals for the regression lines. In both cases, Arabidopsis genotypes are ranked from the less to the more permissive to TuMV infection according to Fig. 1.

1148

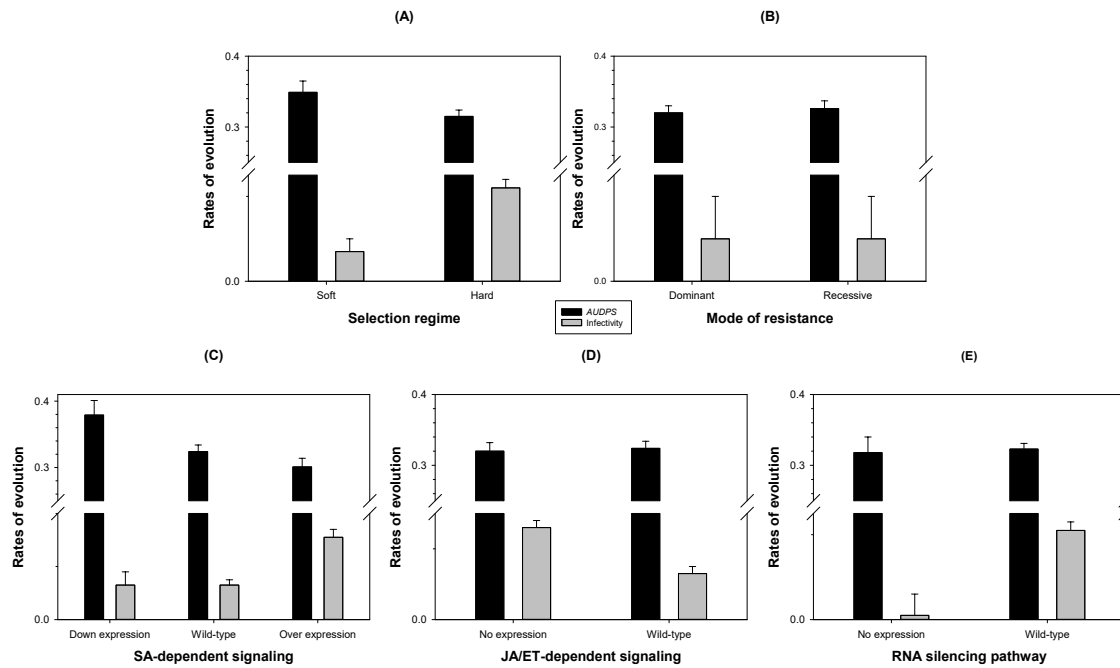

**Fig. 7.** The rates of evolution for *AUDPS* and *I* differ among possible mechanisms of resistance to infection. Rates of evolution are expressed in log-scale to better visualize the slowest rates of *I* evolution. Data were fitted to the MANOVA model defined by Eq. 3. Error bars represent  $\pm 1$  SEM.

1149

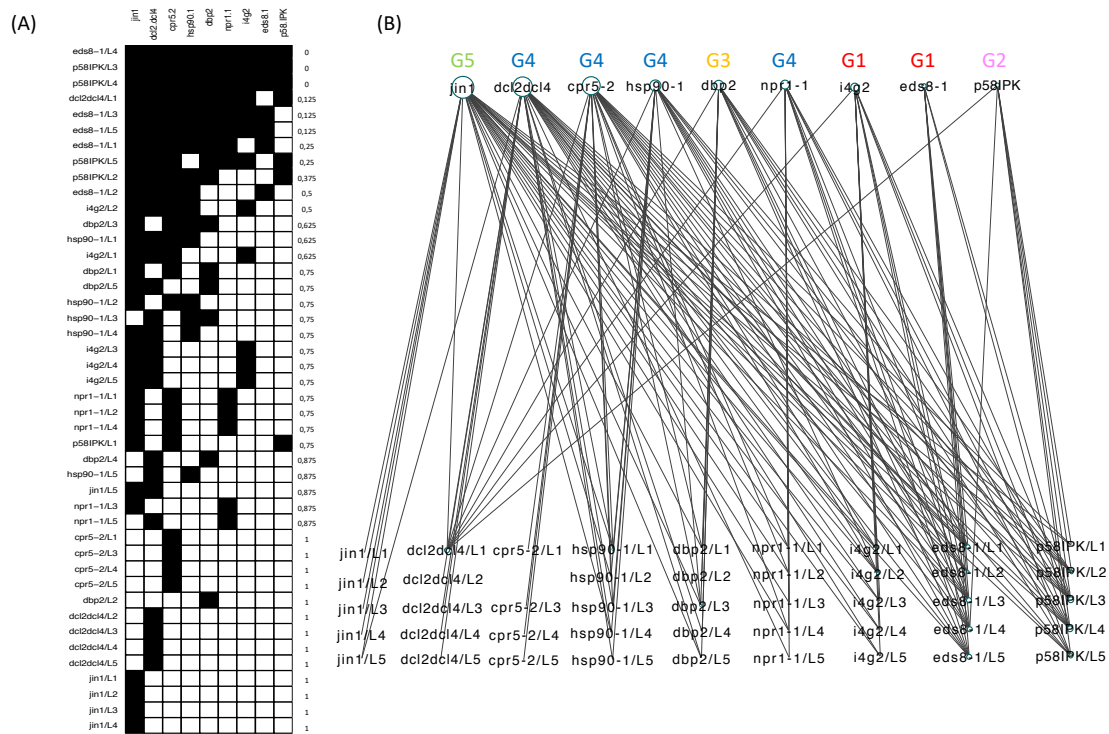

**Fig. 8.** Analysis of the full cross-infection matrix. (A) Packed matrix that highlights the its nested structure, compatible with a gene-for-gene infection model. Black squares represent cases in which the *AUDPS* values were equal or greater than those observed for the corresponding lineage in its local host. Last column shows the species-level specialization index  $d'$  ( $d' = 0$  means most generalist pathogen,  $d' = 1$  means most specialist pathogen). (B) Bipartite host genotype - viral lineage infection network. The size of the nodes is proportional to their degree. The phenotypic groups defined in Fig. 1 are indicated above the host genotype.

1150

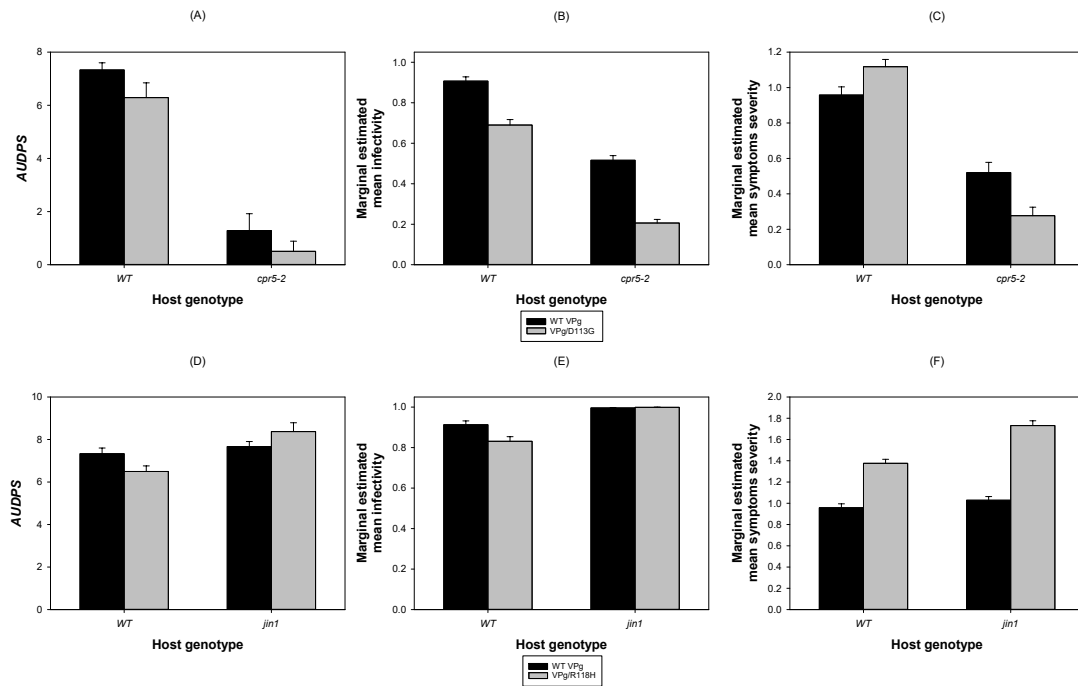

**Fig. 9.** Phenotypic disease-related traits (*AUDPS*, *I* and *SS*) of TuMV VPg/D113G relative to TuMV wild-type VPg. (A) – (C) Evaluated in the wild-type *Arabidopsis* and the *cpr5-2* mutant genotype. (D) – (F) Evaluated in the wild-type *Arabidopsis* and the *jin1* mutant genotype. Error bars represent  $\pm 1$  SEM.

1151

**Table 1.** Different Arabidopsis mutant genotypes used in this study. Highlighted in gray those used for the evolution experiments.

| <b>Genotype</b>  | <b>Gene name</b>                                        | <b>Affected pathway</b>                                                    | <b>Expected phenotype relative to wild-type plants</b> | <b>Reference</b>              |
|------------------|---------------------------------------------------------|----------------------------------------------------------------------------|--------------------------------------------------------|-------------------------------|
| <i>coi1-4</i>    | <i>CORONATINE INSENSITIVE 1</i> (AT2G39940)             | Repression of JA-responsive genes                                          | No ISR, no effect on virus                             | Thines <i>et al.</i> (2007)   |
| <i>cpr5-2</i>    | <i>CONSTITUTIVE EXPRESSOR OF PR GENES 5</i> (AT5G64930) | Membrane protein, negative regulator of pathogen-dependent SA signaling    | More resistant, constitutive SAR                       | Love <i>et al.</i> (2007)     |
| <i>dbp2</i>      | <i>DNA-BINDING PROTEIN PHOSPHATASE 2</i>                | Transcriptional regulation of gene expression in potyvirus-infected plants | More resistant to potyvirus infection                  | Castelló <i>et al.</i> (2011) |
| <i>dcl2</i>      | <i>DICER-LIKE 2</i> (AT3G03300)                         | Partial loss of RNA-silencing                                              | No effect, siRNAs produced by DCL4                     | Bouché <i>et al.</i> (2006)   |
| <i>dcl4</i>      | <i>DICER-LIKE 4</i> (AT5G20320)                         | Partial loss of RNA-silencing                                              | No effect, siRNA produced by DCL2                      | Bouché <i>et al.</i> (2006)   |
| <i>dcl2 dcl4</i> | Double mutant <i>dcl2 dcl4</i>                          | Complete loss of RNA-silencing                                             | More susceptible, no siRNA production                  | Bouché <i>et al.</i> (2006)   |
| <i>dip2</i>      | <i>DBP-INTERACTING PROTEIN 2</i> (AT5G03210)            | Transcriptional regulation of gene expression in potyvirus-infected plants | More susceptible                                       | Castelló <i>et al.</i> (2011) |
| <i>eds4-1</i>    | <i>ENHANCED DISEASE SUSCEPTIBILITY 4</i> (AT5G51200)    | Loss of SA-dependent signaling                                             | More susceptible, no SAR                               | Gupta <i>et al.</i> (2000)    |
| <i>eds5-1</i>    | <i>ENHANCED DISEASE SUSCEPTIBILITY 5</i> (AT4G39030)    | Lipase-like protein, positive regulator of pathogen-dependent SA signaling | More susceptible, no SAR                               | Nawrath <i>et al.</i> (2002)  |
| <i>eds8-1</i>    | <i>ENHANCED DISEASE SUSCEPTIBILITY 8</i>                | Reduced expression of plant defensin genes, reduced ISR                    | More resistant, enhanced SAR                           | Love <i>et al.</i> (2007)     |
| <i>ein2-1</i>    | <i>ETHYLENE INSENSITIVE 2</i> (AT5G03280)               | MAPK, ET signaling intermediate, negative regulator SA-dependent signaling | More resistant, enhanced SAR                           | Love <i>et al.</i> (2007)     |
| <i>etr1-1</i>    | <i>ETHYLENE RESPONSE 1</i> (AT1G66340)                  | ET receptor, negative regulator SA-dependent signaling                     | More resistant, enhanced SAR                           | Love <i>et al.</i> (2007)     |



|                          |                                                                        |  |   |                                                                                             |                                                             |                                   |
|--------------------------|------------------------------------------------------------------------|--|---|---------------------------------------------------------------------------------------------|-------------------------------------------------------------|-----------------------------------|
| <i>hsp90-1</i>           | <i>HEAT SHOCK PROTEIN 1</i> (AT5G52640)                                |  |   | Recessive <i>r</i> gene, required for membrane-bound replication complexes; protein folding | More resistant, missing component for viral replication     | Verchot (2012)                    |
| <i>i4g1</i>              | <i>EUKARYOTIC TRANSLATION INITIATION FACTOR (ISO) 4G 1</i> (AT3G60240) |  |   | Recessive <i>r</i> gene, initiation of viral RNA translation                                | More resistant, missing component for viral gene expression | Nicaise <i>et al.</i> (2007)      |
| <i>i4g2</i>              | <i>EUKARYOTIC TRANSLATION INITIATION FACTOR (ISO) 4G 2</i>             |  |   | Recessive <i>r</i> gene, initiation of viral RNA translation                                | More resistant, missing component for viral gene expression | Nicaise <i>et al.</i> (2007)      |
| <i>jin1</i>              | <i>JASMONATE INSENSITIVE 1</i> (AT1G32640)                             |  | 1 | Loss of JA signaling; negative regulator of SA-dependent signaling                          | More resistant, enhanced SAR                                | Laurie-Berry <i>et al.</i> (2006) |
| <i>npr1-1</i>            | <i>NONEXPRESSER OF PR GENES 1</i> (AT1G64280)                          |  | 1 | Ankyrin-repeat protein required for <i>PR-1</i> activation                                  | More susceptible, no SAR, no ISR                            | Cao <i>et al.</i> (1994)          |
| <i>p58<sup>IPK</sup></i> | <i>HOMOLOG OF MAMMALIAN P58<sup>IPK</sup></i> (AT5G03160)              |  |   | Constitutive activation of PKR                                                              | More resistant, strong apoptosis-mediated HR                | Bilgin <i>et al.</i> (2003)       |
| <i>pad4-1</i>            | <i>PHYTOALEXIN DEFICIENT 4</i> (AT3G52430)                             |  | 4 | Lipase-like protein, positive regulator pathogen-dependent SA signaling                     | More susceptible, no SAR                                    | Cui <i>et al.</i> (2018)          |
| <i>sid2-1</i>            | <i>SA INDUCTION DEFICIENT 2</i> (AT1G74710)                            |  | 2 | Isochorismate synthase, required for SA biosynthesis                                        | More susceptible, no SAR                                    | Nawrath and Métraux (1999)        |

ET - ethylene; HR – hypersensitive response; ISR - induced systemic resistance; JA - jasmonic acid; MAPK – mitogen-activated protein kinase; PKR - protein kinase RNA-activated; SA - salicylic acid; SAR - systemic acquired resistance

**Table 2.** Results of the multivariate analysis of variance (MANCOVA) for the three phenotypic traits evaluated along the course of experimental evolution. The different factors are defined in Eq. 1.

| Source of variation | Wilk's $\Lambda$ | $F$      | $df_1, df_2$ | $P$     | $\eta_p^2$ | $1 - \beta$ |
|---------------------|------------------|----------|--------------|---------|------------|-------------|
| $\mu$               | 0.004            | 3377.616 | 3, 42        | < 0.001 | 0.996      | 1.000       |
| $t$                 | 0.265            | 38.799   | 3, 42        | < 0.001 | 0.735      | 1.000       |
| $G$                 | 0.093            | 6.467    | 24, 122.414  | < 0.001 | 0.547      | 1.000       |
| $t \times G$        | 0.155            | 4.608    | 24, 122.414  | < 0.001 | 0.463      | 1.000       |
| $L(G)$              | 0.529            | 0.278    | 108, 126.692 | 1.000   | 0.191      | 0.373       |
| $t \times L(G)$     | 0.466            | 0.351    | 105, 126.677 | 1.000   | 0.225      | 0.487       |

$\eta_p^2$ : magnitude of the effect;  $1 - \beta$ : power of the test.

1153

1154

**Table 3.** Results of the probit regression testing for the specificity of adaptation. The different model factors are defined in Eq. 4.

| Source of variation        | LRT       | $df$ | $P$     | $\eta_p^2$ | $1 - \beta$ |
|----------------------------|-----------|------|---------|------------|-------------|
| $\phi$                     | 21224.493 | 1    | < 0.001 | 0.959      | 1.000       |
| $t$                        | 25995.056 | 1    | < 0.001 | 0.815      | 1.000       |
| $TG$                       | 295.160   | 8    | < 0.001 | 0.569      | 1.000       |
| $t \times TG$              | 568.212   | 8    | < 0.001 | 0.010      | 0.981       |
| $LG$                       | 20.545    | 8    | 0.008   | 0.288      | 0.661       |
| $t \times LG$              | 30.200    | 8    | < 0.001 | 0.005      | 0.804       |
| $L(LG)$                    | 207.257   | 35   | < 0.001 | 0.385      | 1.000       |
| $t \times L(LG)$           | 235.073   | 35   | < 0.001 | 0.016      | 0.984       |
| $TG \times LG$             | 258.888   | 64   | < 0.001 | 0.314      | 1.000       |
| $t \times TG \times LG$    | 365.512   | 64   | < 0.001 | 0.018      | 0.961       |
| $TG \times L(LG)$          | 788.661   | 280  | < 0.001 | 0.048      | 0.999       |
| $t \times TG \times L(LG)$ | 1033.649  | 280  | < 0.001 | 0.042      | 0.993       |

LRT: likelihood ratio test distributed as a  $\chi^2$ ;  $\eta_p^2$ : magnitude of the effect;  $1 - \beta$ : power of the test.

1155

1156 **Additional Information**

1157

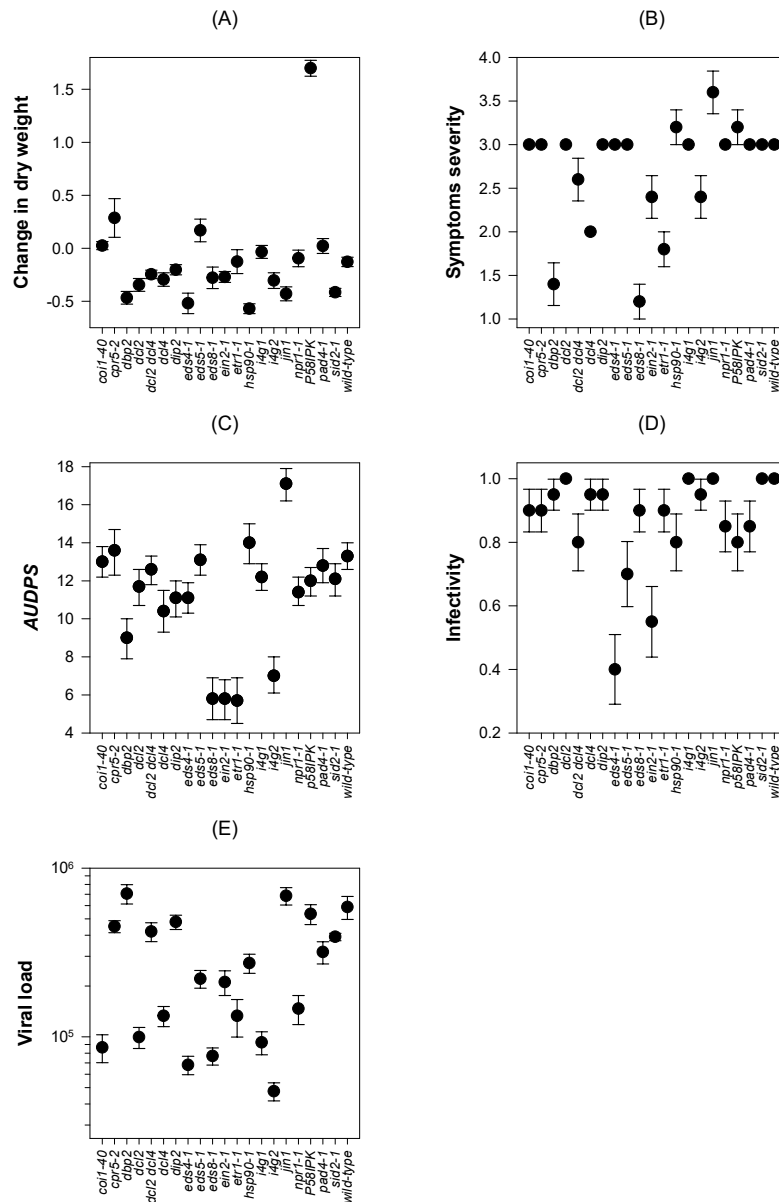

**Fig. S1.** Disease-related traits evaluated for the 21 Arabidopsis genotypes listed in Table 1. (A) Change in dry weight ( $\Delta DW$ ; genetic component of variance  $\sigma_G^2 = 93.09\%$ , one-way ANOVA  $F_{20,84} = 71.820$ ,  $P < 0.001$ ). (B) Severity of symptoms ( $SS$ ;  $\sigma_G^2 = 75.88\%$ ,  $F_{20,84} = 17.643$ ,  $P < 0.001$ ). (C) Area under the disease progress stairs ( $AUDPS$ ;  $\sigma_G^2 = 99.96\%$ ,  $F_{20,399} = 2626.754$ ,  $P < 0.001$ ). (D) Infectivity ( $I$ ;  $\sigma_G^2 = 78.91\%$ ,  $F_{20,399} = 4.563$ ,  $P < 0.001$ ). (E) Viral load ( $VL$ ;  $\sigma_G^2 = 78.99\%$ ,  $F_{20,84} = 22.113$ ,  $P < 0.001$ ). Error bars represent  $\pm 1$  SEM, except for the  $AUDPS$ , which are 95% confidence intervals based in 1000 bootstrap pseudo-replicates.

1158

1159

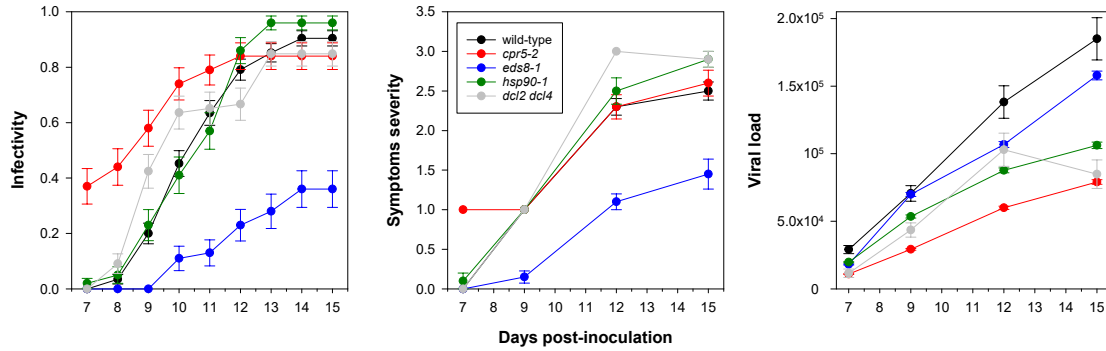

**Fig. S2.** Daily variation of (A) infectivity (*I*), (B) symptoms severity (*SS*) and (C) viral load (*VL*) for genotypes representative of groups G1 (*eds8-1* more resistant than wild-type to TuMV infection) and G4 (*cpr5-2*, *dcl2 dcl4*, *hsp90-1* similar to wild-type in response to infection) in Fig. 1. Error bars represent  $\pm 1$  SEM.

1160

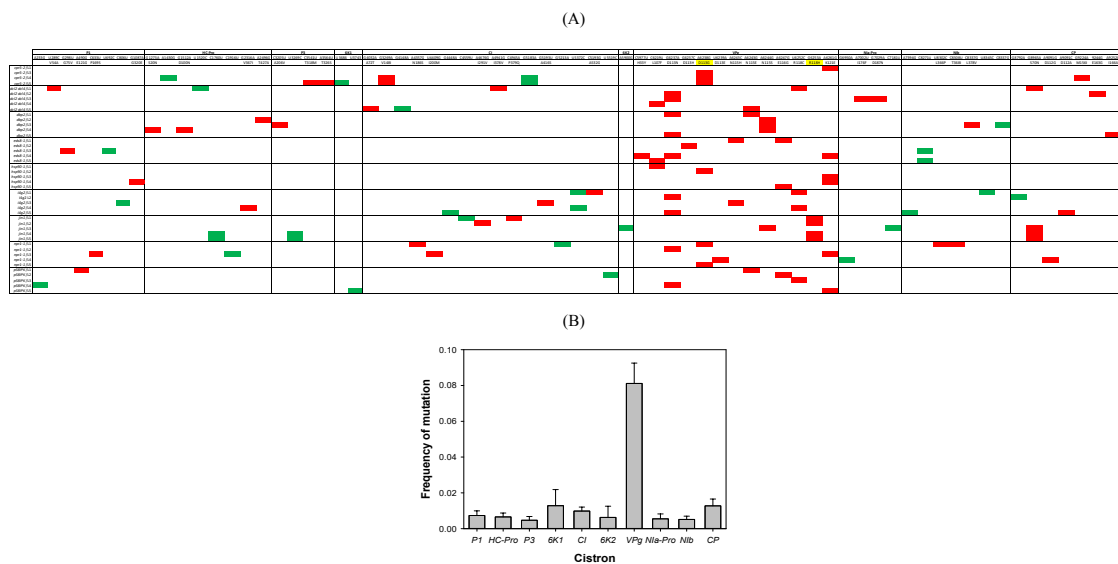

**Fig. S3.** Distribution of observed mutations per TuMV cistron. (A) Schematic representation of the distribution of synonymous (green boxes) and nonsynonymous (red boxes) distribution along TuMV genome. (B) Frequency of mutations observed on each cistron. Error bars represent  $\pm 1$  SEM.

1161

**Table S1.** Nucleotide and amino acid changes found in the consensus sequences of the TuMV evolved viruses. SNP positions referred to the complete genome. Amino acid changes positions are referred to the mature peptide.

| ORF    | Lineages                    | Mutation | Amino acid change | Amino acid group change                        | Syn:Nosyn | Ts:Tv |
|--------|-----------------------------|----------|-------------------|------------------------------------------------|-----------|-------|
| P1     | <i>p58<sup>IPK</sup>/L4</i> | A233G    | synonymous        |                                                |           |       |
|        | <i>dcl2 dcl4/L1</i>         | U289C    | V45A              | conservative nonpolar by nonpolar              |           |       |
|        | <i>eds8-1/L3</i>            | G298U    | G75V              | conservative nonpolar by nonpolar              |           |       |
|        | <i>p58<sup>IPK</sup>/L1</i> | A490G    | E121G             | negatively charged by nonpolar                 |           |       |
|        | <i>npr1-1/L3</i>            | C633U    | P169S             | nonpolar by nonpolar, strong structural effect | 3:5       | 7:1   |
|        | <i>eds8-1/L3</i>            | U692C    | synonymous        |                                                |           |       |
|        | <i>i4g2/L3</i>              | C806U    | synonymous        |                                                |           |       |
|        | <i>hsp90-1/L4</i>           | G1087A   | G320E             | nonpolar by negatively charged                 |           |       |
| HC-Pro | <i>dbp2/L4</i>              | G1273A   | S20N              | small polar by larger polar                    |           |       |
|        | <i>cpr5-2/L4</i>            | A1430G   | synonymous        |                                                |           |       |
|        | <i>dbp2/L4</i>              | G1512A   | D100N             | negatively charged by polar                    |           |       |
|        | <i>dcl2 dcl4/L1</i>         | U1520C   | synonymous        |                                                | 5:4       | 9:0   |
|        | <i>jin1/L4</i>              |          |                   |                                                |           |       |
|        | <i>jin1/L5</i>              | C1760U   | synonymous        |                                                |           |       |
|        | <i>npr1-1/L3</i>            | C1916U   | synonymous        |                                                |           |       |

|                     |                             |        |                                   |                                                |      |      |
|---------------------|-----------------------------|--------|-----------------------------------|------------------------------------------------|------|------|
|                     | <i>i4g2/L4</i>              | G2316A | V367I                             | conservative small nonpolar by longer nonpolar |      |      |
|                     | <i>dbp2/L2</i>              | A2493G | T326S                             | small polar by nonpolar                        |      |      |
| P3                  | <i>dbp2/L3</i>              | C3205U | A206V                             | conservative nonpolar by nonpolar              |      |      |
|                     | <i>jin1/L4</i>              | U3269C | synonymous                        |                                                |      |      |
|                     | <i>jin1/L5</i>              |        |                                   |                                                | 2:3  | 3:1  |
|                     | <i>cpr5-2/L5</i>            | C3541U | T318M                             | small polar by long nonpolar                   |      |      |
|                     | <i>cpr5-2/L5</i>            | A3564U | T326S                             | conservative polar by polar                    |      |      |
| 6KI                 | <i>cpr5-2/L5</i>            | U3686C | synonymous                        |                                                | 2:0  | 2:0  |
|                     | <i>p58<sup>IPK</sup>/L5</i> | U3743C | synonymous                        |                                                |      |      |
| CI                  | <i>dcl2 dcl4/L5</i>         | G4032A | A72T                              | small nonpolar by polar                        |      |      |
|                     | <i>dcl2 dcl4/L5</i>         | G4148A | synonymous                        |                                                |      |      |
|                     | <i>cpr5-2/L4</i>            | G3269A | V148I                             | conservative small nonpolar by larger nonpolar |      |      |
|                     | <i>cpr5-2/L5</i>            |        |                                   |                                                |      |      |
|                     | <i>npr1-1/L1</i>            | A4357G | N186S                             | positively charged by small polar              | 6:13 | 15:4 |
|                     | <i>npr1-1/L3</i>            | U4409G | I200M                             | conservative nonpolar by nonpolar              |      |      |
|                     | <i>i4g2/L5</i>              | G4448A | synonymous                        |                                                |      |      |
|                     | <i>jin1/L1</i>              | C4559U | synonymous                        |                                                |      |      |
|                     | <i>jin1/L2</i>              | A4674G | I291V                             | conservative nonpolar by nonpolar              |      |      |
| <i>dcl2 dcl4/L1</i> | A4941G                      | I378V  | conservative nonpolar by nonpolar |                                                |      |      |

|            |                              |        |            |                                             |      |      |
|------------|------------------------------|--------|------------|---------------------------------------------|------|------|
|            | <i>jin1</i> /L1              | C4945A | P379Q      | nonpolar by polar, strong structural effect |      |      |
|            | <i>cpr5-2</i> /L4            | G5183A | synonymous |                                             |      |      |
|            | <i>cpr5-2</i> /L5            |        |            |                                             |      |      |
|            | <i>i4g2</i> /L3              | G5193U | A416S      | nonpolar by polar                           |      |      |
|            | <i>npr1-1</i> /L1            | G5213A | synonymous |                                             |      |      |
|            | <i>i4g2</i> /L1              | U5372C | synonymous |                                             |      |      |
|            | <i>i4g2</i> /L4              |        |            |                                             |      |      |
|            | <i>i4g2</i> /L1              | C5193G | A532G      | conservative nonpolar by nonpolar           |      |      |
|            | <i>p58<sup>IPK</sup></i> /L2 | U5519C | synonymous |                                             |      |      |
| <b>6K2</b> | <i>jin1</i> /L3              | A5900G | synonymous |                                             | 1:0  | 1:0  |
|            | <i>eds8-1</i> /L4            | C5977U | H33Y       | positively charged by polar                 |      |      |
|            | <i>eds8-1</i> /L5            |        |            |                                             |      |      |
|            | <i>hsp90-1</i> /L1           | C6219U | L107F      | conservative nonpolar by nonpolar           |      |      |
| <b>VPg</b> | <i>dcl2 dcl4</i> /L4         |        |            |                                             | 0:47 | 45:2 |
|            | <i>dbp2</i> /L1              |        |            |                                             |      |      |
|            | <i>dbp2</i> /L5              | G6237A | D113N      | negatively charged by polar                 |      |      |
|            | <i>i4g2</i> /L2              |        |            |                                             |      |      |
|            | <i>i4g2</i> /L5              |        |            |                                             |      |      |

*dcl2 dcl4/L2*

*dcl2 dcl4/L3*

*eds8-1/L4*

*p58<sup>IPK</sup>/L4*

*npr1-1/L2*

*eds8-1/L2* G6237C D113H negatively charged by positively charge

*cpr5-2/L3*

*cpr5-2/L4*

*cpr5-2/L5*

A6238G D113G negatively charged by nonpolar

*npr1-1/L1*

*npr1-1/L5*

*hsp90-1/L2*

*npr1-1/L4* U6239A D113E conservative negatively charged by negatively charged

*i4g2/L3*

A6243C N115H polar by positively charged

*eds8-1/L3*

*dbp2/L1*

*dcl2 dcl4/L5* A6243G N115E polar by negatively charged

*p58<sup>IPK</sup>/L1*

*dbp2/L2*

A6244G N115S conservative polar by polar

*dbp2/L3*



|                             |        |       |                                                       |
|-----------------------------|--------|-------|-------------------------------------------------------|
| <i>dbp2/L4</i>              |        |       |                                                       |
| <i>jin1/L3</i>              |        |       |                                                       |
| <i>eds8-1/L1</i>            |        |       |                                                       |
| <i>hsp90-1/L5</i>           | A6247G | E116G | negatively charged by small nonpolar                  |
| <i>p58<sup>IPK</sup>/L2</i> |        |       |                                                       |
| <i>i4g2/L1</i>              |        |       |                                                       |
| <i>i4g2/L4</i>              | U6252C | R118C | positively charged by nonpolar                        |
| <i>dcl2 dcl4/L1</i>         |        |       |                                                       |
| <i>p58<sup>IPK</sup>/L3</i> |        |       |                                                       |
| <i>jin1/L1</i>              |        |       |                                                       |
| <i>jin1/L2</i>              | G6253A | R118H | conservative positively charged by positively charged |
| <i>jin1/L4</i>              |        |       |                                                       |
| <i>jin1/L5</i>              |        |       |                                                       |
| <i>hsp90-1/L3</i>           |        |       |                                                       |
| <i>hsp90-1/L4</i>           |        |       |                                                       |
| <i>cpr5-2/L1</i>            | A6261G | K121E | positively charged by negatively charged              |
| <i>npr1-1/L3</i>            |        |       |                                                       |
| <i>eds8-1/L4</i>            |        |       |                                                       |
| <i>p58<sup>IPK</sup>/L5</i> |        |       |                                                       |

---

|         |                     |         |            |                                                |      |      |
|---------|---------------------|---------|------------|------------------------------------------------|------|------|
| N1a-Pro | <i>npr1-1/L4</i>    | G6950A  | synonymous |                                                |      |      |
|         | <i>dcl2 dcl4/L3</i> | A7002U  | I176F      | nonpolar by nonpolar                           | 2:2  | 3:1  |
|         | <i>dcl2 dcl4/L3</i> | G7029A  | D187N      | negatively charged by polar                    |      |      |
|         | <i>jin1/L3</i>      | C7181U  | synonymous |                                                |      |      |
| N1b     | <i>i4g2/L5</i>      | A7394G  | synonymous |                                                |      |      |
|         | <i>eds8-1/L3</i>    | C8271U  | synonymous |                                                |      |      |
|         | <i>eds8-1/L5</i>    |         |            |                                                |      |      |
|         | <i>npr1-1/L5</i>    | U8302C  | L366P      | nonpolar by nonpolar, strong structural effect | 5:3  | 7:1  |
|         | <i>npr1-1/L5</i>    | C8308U* | T368I      | polar by nonpolar                              |      |      |
|         | <i>dbp2/L3</i>      | C8337G  | L378V      | conservative nonpolar by nonpolar              |      |      |
|         | <i>i4g2/L1</i>      | U8345C  | synonymous |                                                |      |      |
|         | <i>dbp2/L3</i>      | G8360A  | synonymous |                                                |      |      |
| CP      | <i>hsp90-1/L2</i>   | G8792A  | synonymous |                                                |      |      |
|         | <i>jin1/L3</i>      |         |            |                                                |      |      |
|         | <i>jin1/L4</i>      | G8965A  | S70N       | conservative polar by polar                    |      |      |
|         | <i>jin1/L5</i>      |         |            |                                                | 1:10 | 1:10 |
|         | <i>dcl2 dcl4/L1</i> |         |            |                                                |      |      |
|         | <i>npr1-1/L4</i>    | A9091G  | D112G      | negatively charged by small nonpolar           |      |      |
|         | <i>i4g2/L5</i>      | A9091C  | D112A      | negatively charged by small nonpolar           |      |      |

|                     |        |       |                                      |      |
|---------------------|--------|-------|--------------------------------------|------|
| <i>cpr5-2/L4</i>    | G9224A | M156I | conservative nonpolar by nonpolar    | 1162 |
| <i>dcl2 dcl4/L2</i> | A9244G | E163G |                                      |      |
| <i>dbp2/L5</i>      | A9252G | I166V | negatively charged by small nonpolar |      |
| <i>hsp90-1/L1</i>   | C9541U | A262V | conservative nonpolar by nonpolar    |      |

---

\*Polymorphic positions; Syn:Nosyn: number of synonymous *vs* nonsynonymous mutations; Ts:Tv: number of transitions *vs* transversions. The two highlighted nonsynonymous mutations D113G and R118H in VPg have been used in further experiments.
